# Supplementary material
Source: PubMed Central journal article supplement (PMC10258142)
Supplement: NIHMS1870950-supplement-SUPINFO.pdf [file NIHMS1870950-supplement-SUPINFO.pdf]

**Online Only Supplement for Development and Validation of the Fall-Related Injury Risk in Nursing Homes (INJURE-NH) Prediction Tool**

**Supplemental Figure S1.** Flow diagram depicting the selection of long stay nursing home residents in the study sample, 2016-2017.

**Supplemental Figure S2.** Calibration plots of the observed risk of fall-related injury and the predicted risk from the INJURE-NH tool among long-stay nursing home residents in the validation sample.

**Supplemental Table S1.** All characteristics considered for inclusion in risk tool.

**Supplemental Table S2.** Predictors of fall-related injuries included in the final 2-year Fine-Gray sub-distribution hazards regression model (INJURE-NH-Long), development sample.

**Supplemental Table S3.** Predictors of fall-related injuries included in the final 2-year Fine-Gray sub-distribution hazards regression model (INJURE-NH-Long), validation sample.

**Supplemental Table S4.** Predictors of fall-related injuries included in the final 6-month Fine-Gray sub-distribution hazards regression model (INJURE-NH-Long), development sample.

**Supplemental Figure S1. Flow diagram depicting the selection of long stay nursing home residents in the study sample, 2016-2017.**

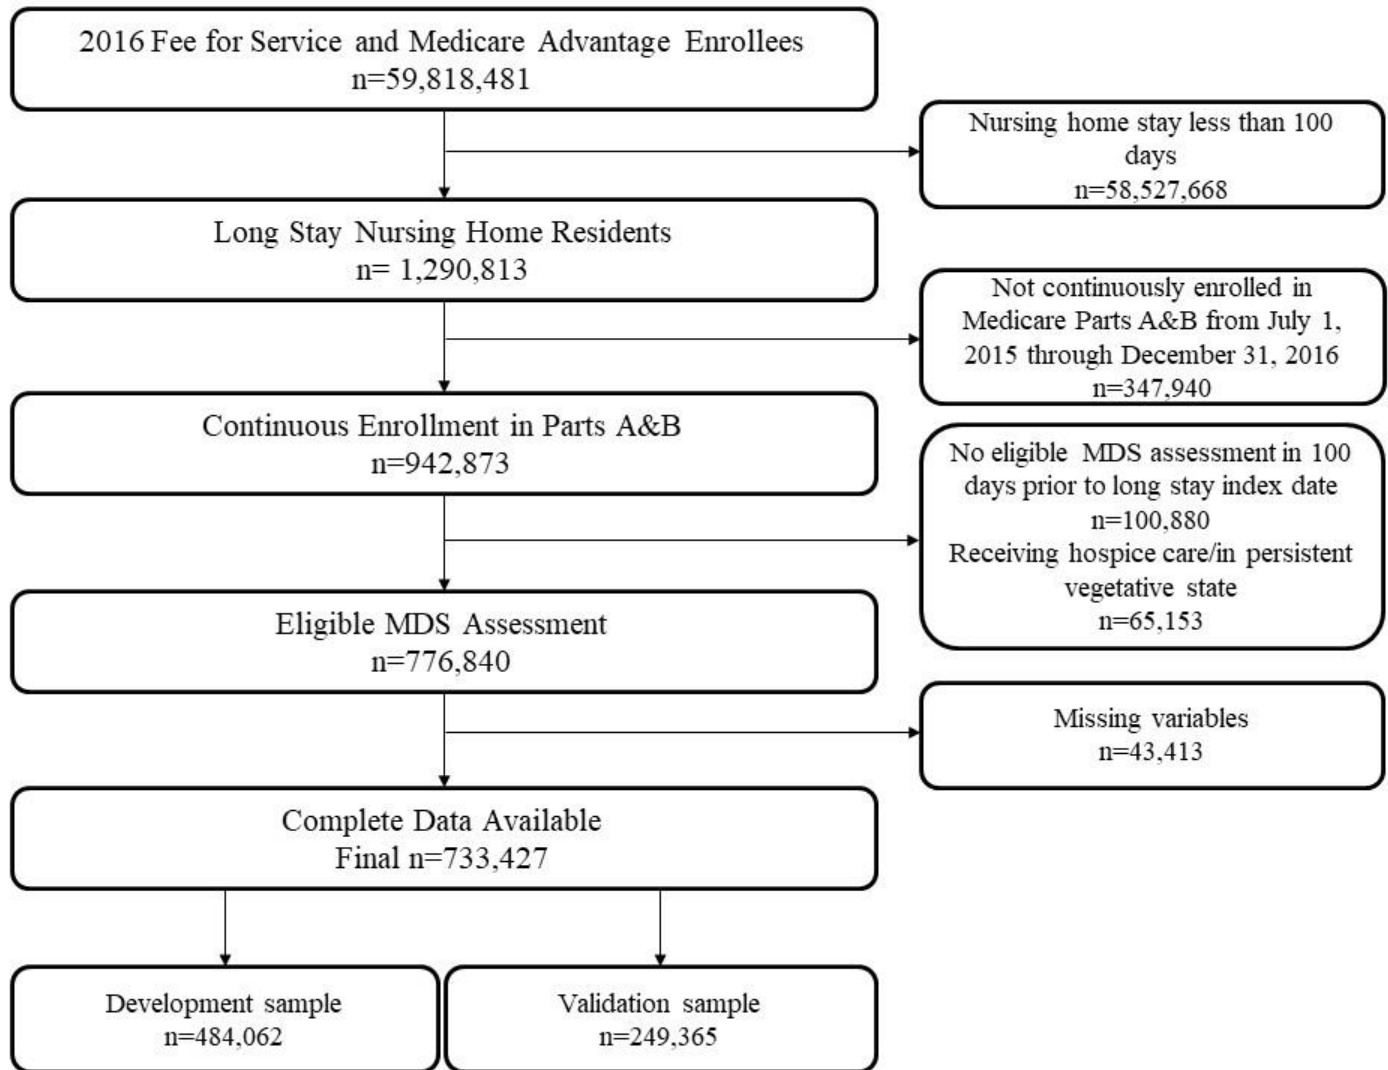

**Supplemental Figure S2.** Calibration plots of the observed risk of fall-related injury and the predicted risk from the INJURE-NH tool among long-stay nursing home residents in the validation sample.

- a. 2-year risk, full model (INJURE-NH), validation sample (n=249,365)
- b. 6-month risk, full model (INJURE-NH), validation sample (n=249,365)

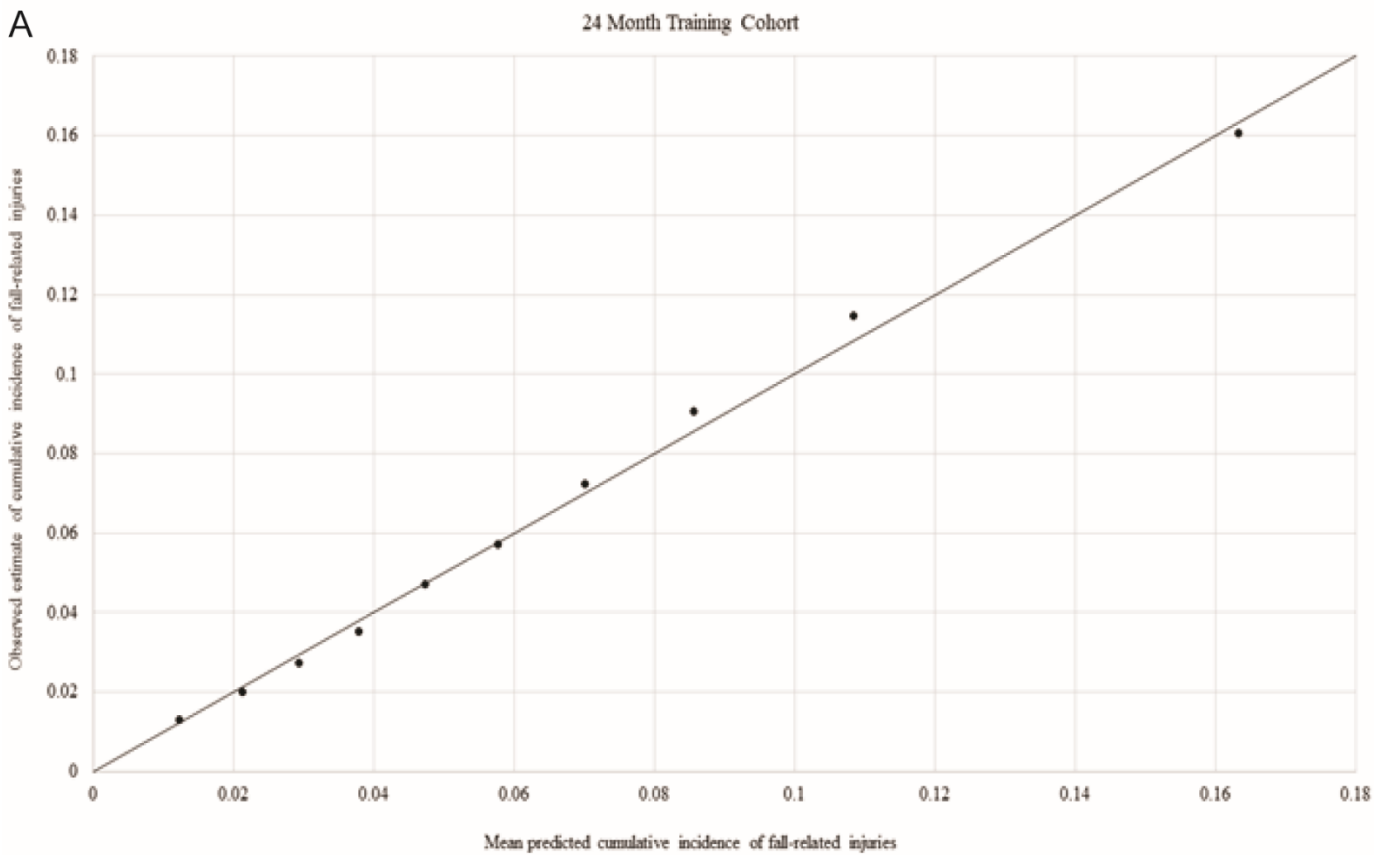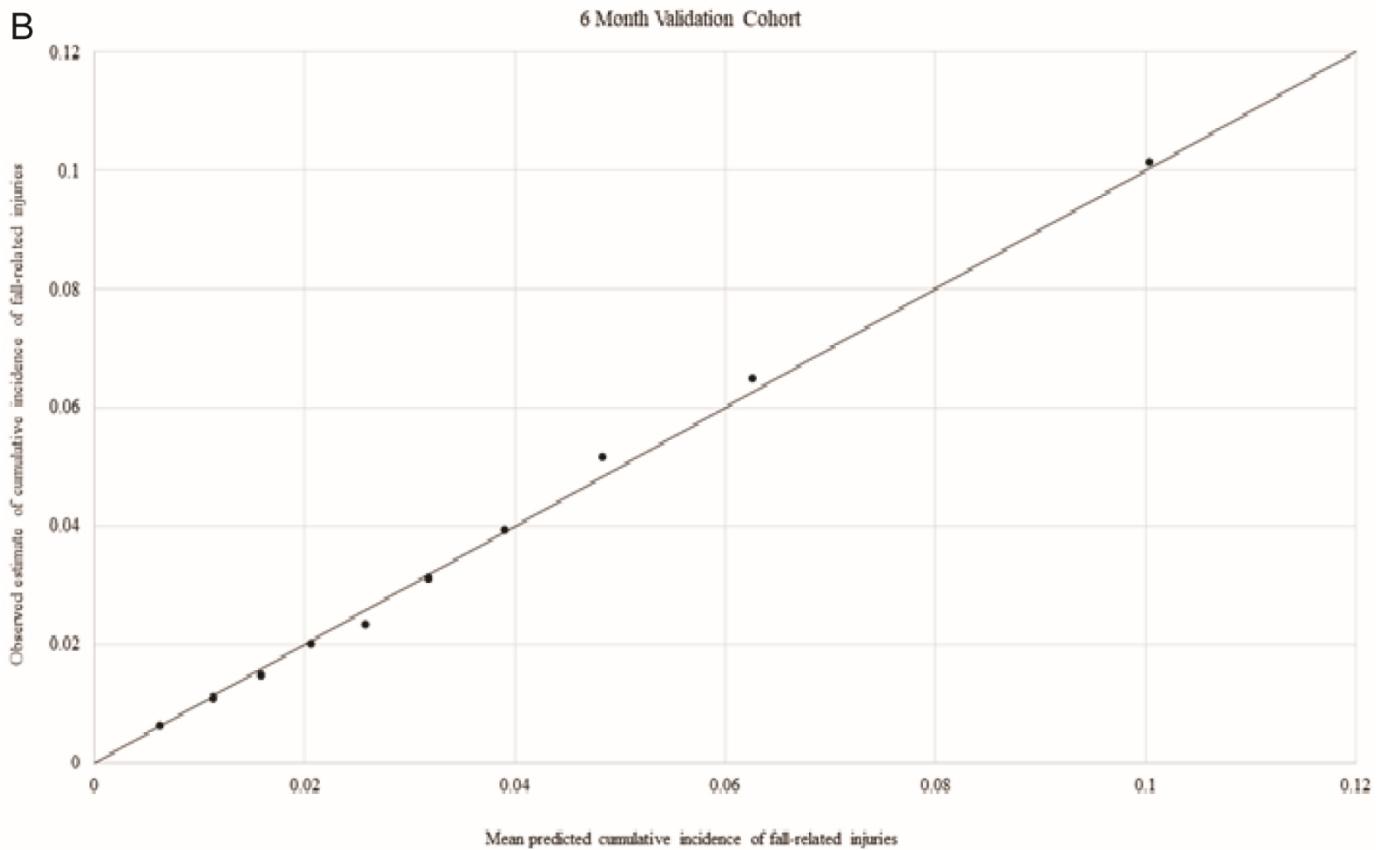

**Supplemental Table S1. All characteristics considered for inclusion in risk tool**

| Variable name                   | Variable description                                 | Functional form | Categories                                                                                                                                                                                         |
|---------------------------------|------------------------------------------------------|-----------------|----------------------------------------------------------------------------------------------------------------------------------------------------------------------------------------------------|
| A0800                           | Gender                                               | Categorical     | 1: Male<br>2: Female                                                                                                                                                                               |
| A0900                           | Age group                                            | Categorical     | 0: 65 to <75<br>1: 75 to <85<br>2: 85 to <100<br>3: $\geq 100$                                                                                                                                     |
| B1000                           | Visual impairment                                    | Categorical     | 0: Adequate/impaired (0, 1)<br>1: Moderate to severely impaired (2, 3, 4)                                                                                                                          |
| m3_CFS                          | Cognitive Function Scale (CFS)                       | Categorical     | 1: Intact<br>2: Mild impairment<br>3: Moderate impairment<br>4: Severe impairment                                                                                                                  |
| ADL_SF                          | Activities of Daily Living – Short Form <sup>b</sup> | Categorical     | 0: 0-8<br>1: 9-12<br>2: 13-16                                                                                                                                                                      |
| I0800 <sup>a</sup>              | Orthostatic Hypotension                              | Categorical     | 0: No<br>1: Yes                                                                                                                                                                                    |
| I2900 <sup>a</sup>              | Diabetes                                             | Categorical     | 0: No<br>1: Yes                                                                                                                                                                                    |
| I3900 <sup>a</sup>              | Hip fracture                                         | Categorical     | 0: No<br>1: Yes                                                                                                                                                                                    |
| J1800,<br>J1900A-C <sup>a</sup> | Recent fall                                          | Categorical     | 0: No fall (J1800=0)<br>1: Fall without injury (J1800A=1, J1900A=1, or J1900A=2)<br>2: Fall resulting in injury (J1900B=1, 2 OR J1900C=1, 2)                                                       |
| A1000                           | Race/Ethnicity                                       | Categorical     | 0: American Indian or Alaska Native or Other or Unknown<br>1: Non-Hispanic White<br>2: Black or African American<br>3: Asian or Native Hawaiian or Other Pacific Islander<br>4: Hispanic or Latino |
| A1100A <sup>a</sup>             | Use of an interpreter to communicate                 | Categorical     | 0: No<br>1: Yes<br>9: Unable to determine                                                                                                                                                          |
| A1200                           | Marital Status                                       | Categorical     | 1: Never married<br>2: Married                                                                                                                                                                     |

|                                            |                                                            |             |                                                                                          |
|--------------------------------------------|------------------------------------------------------------|-------------|------------------------------------------------------------------------------------------|
|                                            |                                                            |             | 3: Widowed<br>4: Separated or divorced                                                   |
| A1900                                      | Date of admission                                          | Categorical | 0: Newly admitted within previous 100 days<br>1: Not admitted within previous 100 days   |
| B0200                                      | Hearing difficulty                                         | Categorical | 0: Adequate<br>1: Minimal difficulty<br>2: Moderate difficulty or highly impaired (2, 3) |
| B0300 <sup>a</sup>                         | Hearing aid used                                           | Categorical | 0: No<br>1: Yes                                                                          |
| B0700, B0800                               | Ability to be understood                                   | Categorical | 0: Always or usually<br>1: Rarely or never                                               |
| B1200 <sup>a</sup>                         | Corrective lenses                                          | Categorical | 0: No<br>1: Yes                                                                          |
| C1310A <sup>a</sup>                        | Evidence of acute change in mental status                  | Categorical | 0: No<br>1: Yes                                                                          |
| C1310B-D <sup>a</sup>                      | Delirium                                                   | Categorical | 0: Behavior not present<br>1: Behavior present                                           |
| D0100 <sup>a</sup>                         | Mood Interview Conducted                                   | Categorical | 0: No<br>1: Yes                                                                          |
| D0300, D0600                               | Depression (scores combined into 1 variable)               | Categorical | 0: Minimal ( $\leq 4$ )<br>1: Mild (5-9)<br>2: Moderate to severe ( $\geq 10$ )          |
| E0100A <sup>a</sup>                        | Hallucinations                                             | Categorical | 0: No<br>1: Yes                                                                          |
| E0100B <sup>a</sup>                        | Delusions                                                  | Categorical | 0: No<br>1: Yes                                                                          |
| E0200A-C, E0800 <sup>a</sup>               | Agitated and Reactive Behavior Scale                       | Categorical | 0: None<br>1: Mild<br>2: Moderate to severe                                              |
| E0200A-C, E0300, E0800, E0900 <sup>a</sup> | Individual Behaviors                                       | Categorical | 0: Behavior not present<br>1: Behavior present                                           |
| E0500A <sup>a</sup>                        | Behaviors put resident at risk for injury                  | Categorical | 0: No<br>1: Yes                                                                          |
| E0500B <sup>a</sup>                        | Behaviors interfere with care                              | Categorical | 0: No<br>1: Yes                                                                          |
| E0500C <sup>a</sup>                        | Behaviors interfere with social activities or interactions | Categorical | 0: No<br>1: Yes                                                                          |

|                     |                                                                                           |             |                                                                                                             |
|---------------------|-------------------------------------------------------------------------------------------|-------------|-------------------------------------------------------------------------------------------------------------|
| E1000A <sup>a</sup> | Wandering places resident at significant risk of getting to a potentially dangerous place | Categorical | 0: No<br>1: Yes                                                                                             |
| E1000B <sup>a</sup> | Wandering significantly intrudes on privacy or activity of others                         | Categorical | 0: No<br>1: Yes                                                                                             |
| E1100 <sup>a</sup>  | Change in behaviors compared to prior assessment                                          | Categorical | 0: Same<br>1: Improved<br>2: Worse<br>3: N/A                                                                |
| G0110A1             | Bed mobility – self performance                                                           | Categorical | 0: Independent<br>1: Supervision<br>2: Limited assistance<br>3: Extensive assistance<br>4: Total dependence |
| G0110B1             | Transfer – self performance                                                               | Categorical | 0: Independent<br>1: Supervision<br>2: Limited assistance<br>3: Extensive assistance<br>4: Total dependence |
| G0110C1             | Walk in room – self performance                                                           | Categorical | 0: Independent<br>1: Supervision<br>2: Limited assistance<br>3: Extensive assistance<br>4: Total dependence |
| G0100D1             | Walk in corridor – self performance                                                       | Categorical | 0: Independent<br>1: Supervision<br>2: Limited assistance<br>3: Extensive assistance<br>4: Total dependence |
| G0110E1             | Locomotion on unit – self performance                                                     | Categorical | 0: Independent<br>1: Supervision<br>2: Limited assistance<br>3: Extensive assistance<br>4: Total dependence |
| G0110F1             | Locomotion off unit – self performance                                                    | Categorical | 0: Independent<br>1: Supervision                                                                            |

|         |                                     |             |                                                                                                                                                                           |
|---------|-------------------------------------|-------------|---------------------------------------------------------------------------------------------------------------------------------------------------------------------------|
| G0110G1 | Dressing – self performance         | Categorical | 2: Limited assistance<br>3: Extensive assistance<br>4: Total dependence<br>0: Independent<br>1: Supervision                                                               |
| G0110H1 | Eating – self performance           | Categorical | 2: Limited assistance<br>3: Extensive assistance<br>4: Total dependence<br>0: Independent<br>1: Supervision                                                               |
| G0110I1 | Toilet use – self performance       | Categorical | 2: Limited assistance<br>3: Extensive assistance<br>4: Total dependence<br>0: Independent<br>1: Supervision                                                               |
| G0110J1 | Personal hygiene – self performance | Categorical | 2: Limited assistance<br>3: Extensive assistance<br>4: Total dependence<br>0: Independent<br>1: Supervision                                                               |
| G0110A2 | Bed mobility – support provided     | Categorical | 2: Limited assistance<br>3: Extensive assistance<br>4: Total dependence<br>0: No setup or physical help from staff<br>1: Setup help only<br>2: One person physical assist |
| G0110B2 | Transfer – support provided         | Categorical | 3: Two + persons physical assist<br>0: No setup or physical help from staff<br>1: Setup help only<br>2: One person physical assist                                        |
| G0110C2 | Walk in room – support provided     | Categorical | 3: Two + persons physical assist<br>0: No setup or physical help from staff<br>1: Setup help only<br>2: One person physical assist                                        |
| G0110D2 | Walk in corridor – support provided | Categorical | 3: Two + persons physical assist<br>0: No setup or physical help from staff                                                                                               |

|         |                                        |             |                                                                                                                                    |
|---------|----------------------------------------|-------------|------------------------------------------------------------------------------------------------------------------------------------|
|         |                                        |             | 1: Setup help only<br>2: One person physical assist<br>3: Two + persons physical assist                                            |
| G0110E2 | Locomotion on unit – support provided  | Categorical | 0: No setup or physical help from staff<br>1: Setup help only<br>2: One person physical assist<br>3: Two + persons physical assist |
| G0110F2 | Locomotion off unit – support provided | Categorical | 0: No setup or physical help from staff<br>1: Setup help only<br>2: One person physical assist<br>3: Two + persons physical assist |
| G0110G2 | Dressing – support provided            | Categorical | 0: No setup or physical help from staff<br>1: Setup help only<br>2: One person physical assist<br>3: Two + persons physical assist |
| G0110H2 | Eating – support provided              | Categorical | 0: No setup or physical help from staff<br>1: Setup help only<br>2: One person physical assist<br>3: Two + persons physical assist |
| G0110I2 | Toilet use – support provided          | Categorical | 0: No setup or physical help from staff<br>1: Setup help only<br>2: One person physical assist<br>3: Two + persons physical assist |
| G0110J2 | Personal hygiene                       | Categorical | 0: No setup or physical help from staff<br>1: Setup help only<br>2: One person physical assist<br>3: Two + persons physical assist |
| G0120A  | Self-performance bathing               | Categorical | 0: Independent<br>1: Limited Assistance<br>2: Extensive assistance<br>3: Dependent<br>4: Total dependence                          |
| G0120B  | Support-provided bathing               | Categorical | 0: Independent<br>1: Limited Assistance<br>2: Extensive assistance<br>3: Dependent                                                 |



|        |                                                          |             |                                                                                                                                                                                                                                     |
|--------|----------------------------------------------------------|-------------|-------------------------------------------------------------------------------------------------------------------------------------------------------------------------------------------------------------------------------------|
| G0120A | Bathing - support                                        | Categorical | 4: 2+ persons physical assist<br>0: Independent<br>1: Supervision<br>2: Physical help limited to transfer only<br>3: Physical help in part of bathing activity<br>4: Total dependence<br>8: Activity itself did not occur           |
| G0120B | Bathing-support                                          | Categorical | 0: No setup or physical help from staff<br>1: Setup help only<br>2: One person physical assist<br>3: Two+ persons physical assist<br>8: ADL itself did not occur or family and/or non-facility staff provided care 100% of the time |
| G0300A | Moving from seated to standing position                  | Categorical | 0: Steady at all times<br>1: Not steady, but able to stabilize without staff assistance<br>2: Not steady, only able to stabilize with staff assistance<br>8: Activity did not occur                                                 |
| G0300B | Walking (with assistive device if used)                  | Categorical | 0: Steady at all times<br>1: Not steady, but able to stabilize without staff assistance<br>2: Not steady, only able to stabilize with staff assistance<br>8: Activity did not occur                                                 |
| G0300C | Turning around                                           | Categorical | 0: Steady at all times<br>1: Not steady, but able to stabilize without staff assistance<br>2: Not steady, only able to stabilize with staff assistance<br>8: Activity did not occur                                                 |
| G0300D | Moving on and off toilet                                 | Categorical | 0: Steady at all times<br>1: Not steady, but able to stabilize without staff assistance<br>2: Not steady, only able to stabilize with staff assistance<br>8: Activity did not occur                                                 |
| G0300E | Surface-to-surface transfer                              | Categorical | 0: Steady at all times<br>1: Not steady, but able to stabilize without staff assistance<br>2: Not steady, only able to stabilize with staff assistance<br>8: Activity did not occur                                                 |
| G0400A | Functional limitation in upper extremity range of motion | Categorical | 0: No impairment<br>1: Impairment on one side<br>2: Impairment on both sides                                                                                                                                                        |
| G0400B | Functional limitation in lower extremity range of motion | Categorical | 0: No impairment<br>1: Impairment on one side<br>2: Impairment on both sides                                                                                                                                                        |

|                     |                                         |             |                                                                                                                          |
|---------------------|-----------------------------------------|-------------|--------------------------------------------------------------------------------------------------------------------------|
| G0600A <sup>a</sup> | Use of cane/crutch                      | Categorical | 0: No<br>1: Yes                                                                                                          |
| G0600B <sup>a</sup> | Use of walker                           | Categorical | 0: No<br>1: Yes                                                                                                          |
| G0600C <sup>a</sup> | Use of wheelchair                       | Categorical | 0: No<br>1: Yes                                                                                                          |
| G0600D <sup>a</sup> | Use of limb prosthesis                  | Categorical | 0: No<br>1: Yes                                                                                                          |
| H0100A <sup>a</sup> | Indwelling catheter                     | Categorical | 0: No<br>1: Yes                                                                                                          |
| H0100C <sup>a</sup> | Ostomy                                  | Categorical | 0: No<br>1: Yes                                                                                                          |
| H0100D <sup>a</sup> | Intermittent catheterization            | Categorical | 0: No<br>1: Yes                                                                                                          |
| H0300, H0400        | Toileting continence                    | Categorical | 0: Always continent<br>1: Occasionally incontinent<br>2: Frequently incontinent<br>3: Always incontinent<br>9: Not rated |
| H0600 <sup>a</sup>  | Constipation                            | Categorical | 0: No<br>1: Yes                                                                                                          |
| I0100 <sup>a</sup>  | Cancer                                  | Categorical | 0: No<br>1: Yes                                                                                                          |
| I0200 <sup>a</sup>  | Anemia                                  | Categorical | 0: No<br>1: Yes                                                                                                          |
| I0300 <sup>a</sup>  | Afib                                    | Categorical | 0: No<br>1: Yes                                                                                                          |
| I0400 <sup>a</sup>  | Coronary artery disease                 | Categorical | 0: No<br>1: Yes                                                                                                          |
| I0500 <sup>a</sup>  | Deep Vein Thrombosis/Pulmonary Embolism | Categorical | 0: No<br>1: Yes                                                                                                          |
| I0600 <sup>a</sup>  | Heart Failure                           | Categorical | 0: No<br>1: Yes                                                                                                          |
| I0700 <sup>a</sup>  | Hypertension                            | Categorical | 0: No<br>1: Yes                                                                                                          |
| I0900 <sup>a</sup>  |                                         | Categorical | 0: No                                                                                                                    |

|                    |                                                                       |             |                 |
|--------------------|-----------------------------------------------------------------------|-------------|-----------------|
|                    | Peripheral Vascular Disease or<br>Peripheral Arterial Disease         |             | 1: Yes          |
| I1100 <sup>a</sup> | Cirrhosis                                                             | Categorical | 0: No<br>1: Yes |
| I1200 <sup>a</sup> | Gastroesophageal Reflux Disease or<br>Ulcer                           | Categorical | 0: No<br>1: Yes |
| I1300 <sup>a</sup> | Ulcerative Colitis, Crohn's Disease, or<br>Inflammatory Bowel Disease | Categorical | 0: No<br>1: Yes |
| I1400 <sup>a</sup> | Benign Prostatic Hyperplasia                                          | Categorical | 0: No<br>1: Yes |
| I1500 <sup>a</sup> | Renal disease                                                         | Categorical | 0: No<br>1: Yes |
| I1550 <sup>a</sup> | Neurogenic bladder                                                    | Categorical | 0: No<br>1: Yes |
| I1650 <sup>a</sup> | Obstructive Uropathy                                                  | Categorical | 0: No<br>1: Yes |
| I1700 <sup>a</sup> | Multidrug resistant organisms                                         | Categorical | 0: No<br>1: Yes |
| I2000 <sup>a</sup> | Pneumonia                                                             | Categorical | 0: No<br>1: Yes |
| I2100 <sup>a</sup> | Septicemia                                                            | Categorical | 0: No<br>1: Yes |
| I2200 <sup>a</sup> | Tuberculosis                                                          | Categorical | 0: No           |
| I2300 <sup>a</sup> | Urinary Tract Infection                                               | Categorical | 0: No<br>1: Yes |
| I2400 <sup>a</sup> | Viral Hepatitis                                                       | Categorical | 0: No<br>1: Yes |
| I2500 <sup>a</sup> | Wound Infection                                                       | Categorical | 0: No<br>1: Yes |
| I3100 <sup>a</sup> | Hyponatremia                                                          | Categorical | 0: No<br>1: Yes |
| I3200 <sup>a</sup> | Hyperkalemia                                                          | Categorical | 0: No<br>1: Yes |
| I3300 <sup>a</sup> | Hyperlipidemia                                                        | Categorical | 0: No<br>1: Yes |

|                    |                                                                |             |                 |
|--------------------|----------------------------------------------------------------|-------------|-----------------|
| I3400 <sup>a</sup> | Thyroid Disorder                                               | Categorical | 0: No<br>1: Yes |
| I3700 <sup>a</sup> | Arthritis                                                      | Categorical | 0: No<br>1: Yes |
| I3800 <sup>a</sup> | Osteoporosis                                                   | Categorical | 0: No<br>1: Yes |
| I4000 <sup>a</sup> | History of other fracture                                      | Categorical | 0: No<br>1: Yes |
| I4200 <sup>a</sup> | Alzheimer's                                                    | Categorical | 0: No<br>1: Yes |
| I4300 <sup>a</sup> | Aphasia                                                        | Categorical | 0: No<br>1: Yes |
| I4400 <sup>a</sup> | Cerebral Palsy                                                 | Categorical | 0: No<br>1: Yes |
| I4500 <sup>a</sup> | Cerebrovascular accident, Transient Ischemic Attack, or Stroke | Categorical | 0: No<br>1: Yes |
| I4800 <sup>a</sup> | Other dementia                                                 | Categorical | 0: No<br>1: Yes |
| I4900 <sup>a</sup> | Hemiplegia                                                     | Categorical | 0: No<br>1: Yes |
| I5000 <sup>a</sup> | Paraplegia                                                     | Categorical | 0: No<br>1: Yes |
| I5100 <sup>a</sup> | Quadriplegia                                                   | Categorical | 0: No<br>1: Yes |
| I5200 <sup>a</sup> | Multiple Sclerosis                                             | Categorical | 0: No<br>1: Yes |
| I5250 <sup>a</sup> | Huntington's Disease                                           | Categorical | 0: No<br>1: Yes |
| I5300 <sup>a</sup> | Parkinson's disease                                            | Categorical | 0: No<br>1: Yes |
| I5350 <sup>a</sup> | Tourette's Syndrome                                            | Categorical | 0: No<br>1: Yes |
| I5400 <sup>a</sup> | Seizure disorder or Epilepsy                                   | Categorical | 0: No<br>1: Yes |
| I5500 <sup>a</sup> | Traumatic Brain Injury                                         | Categorical | 0: No<br>1: Yes |

|                           |                                                                             |             |                                                                                                   |
|---------------------------|-----------------------------------------------------------------------------|-------------|---------------------------------------------------------------------------------------------------|
| I5600 <sup>a</sup>        | Malnutrition                                                                | Categorical | 0: No<br>1: Yes                                                                                   |
| I5700 <sup>a</sup>        | Anxiety Disorder                                                            | Categorical | 0: No<br>1: Yes                                                                                   |
| I5800 <sup>a</sup>        | Depression                                                                  | Categorical | 0: No<br>1: Yes                                                                                   |
| I5900 <sup>a</sup>        | Manic Depression                                                            | Categorical | 0: No<br>1: Yes                                                                                   |
| I5950 <sup>a</sup>        | Psychotic Disorder                                                          | Categorical | 0: No<br>1: Yes                                                                                   |
| I6000 <sup>a</sup>        | Schizophrenia                                                               | Categorical | 0: No<br>1: Yes                                                                                   |
| I6100 <sup>a</sup>        | Post-Traumatic Stress Disorder                                              | Categorical | 0: No<br>1: Yes                                                                                   |
| I6200 <sup>a</sup>        | Asthma, Chronic Obstructive<br>Pulmonary Disease or Chronic Lung<br>Disease | Categorical | 0: No<br>1: Yes                                                                                   |
| I6300 <sup>a</sup>        | Respiratory Failure                                                         | Categorical | 0: No<br>1: Yes                                                                                   |
| I6500 <sup>a</sup>        | Cataracts, Glaucoma, or Macular<br>Degeneration                             | Categorical | 0: No<br>1: Yes                                                                                   |
| J0100A-C <sup>a</sup>     | Pain level based on management                                              | Categorical | 0: No or minimal pain<br>1: Mild pain<br>2: Moderate pain<br>3: Severe pain                       |
| J0200, J0300,<br>J0600A-B | Pain intensity                                                              | Categorical | 0: No pain<br>1: Mild pain<br>2: Moderate pain<br>3: Severe to horrible pain<br>9: Unable to rate |
| J0800A-D                  | MDS Pain Behavior Scale                                                     | Categorical | 0: No pain or mild pain<br>1: Moderate pain or worse                                              |
| J1100A-C <sup>a</sup>     | Shortness of breath                                                         | Categorical | 0: No<br>1: Yes                                                                                   |
| J1300 <sup>a</sup>        | Current tobacco use                                                         | Categorical | 0: No<br>1: Yes                                                                                   |

|                       |                                                    |             |                                                                                                                                                                                                                                                                                                                     |
|-----------------------|----------------------------------------------------|-------------|---------------------------------------------------------------------------------------------------------------------------------------------------------------------------------------------------------------------------------------------------------------------------------------------------------------------|
| J1400 <sup>a</sup>    | Prognosis – Life Expectancy of less than 6 months  | Categorical | 0: No<br>1: Yes                                                                                                                                                                                                                                                                                                     |
| J1550A <sup>a</sup>   | Fever                                              | Categorical | 0: No<br>1: Yes                                                                                                                                                                                                                                                                                                     |
| J1550B <sup>a</sup>   | Vomiting                                           | Categorical | 0: No<br>1: Yes                                                                                                                                                                                                                                                                                                     |
| J1550C <sup>a</sup>   | Dehydrated                                         | Categorical | 0: No<br>1: Yes                                                                                                                                                                                                                                                                                                     |
| J1550D <sup>a</sup>   | Internal Bleeding                                  | Categorical | 0: No<br>1: Yes                                                                                                                                                                                                                                                                                                     |
| K0100A-D <sup>a</sup> | Swallowing disorders                               | Categorical | 0: No<br>1: Yes                                                                                                                                                                                                                                                                                                     |
| K0200A,B              | Body Mass Index                                    | Categorical | 0: Underweight ( $15 \leq \text{BMI} \leq 18.5$ )<br>1: Normal weight ( $18.5 < \text{BMI} \leq 25$ )<br>2: Overweight ( $25 < \text{BMI} \leq 30$ )<br>3: Obesity class I ( $30 < \text{BMI} \leq 35$ )<br>4: Obesity class II/III ( $35 < \text{BMI} \leq 45$ )<br>5: Implausible ( $\text{BMI} < 15$ or $> 45$ ) |
| K0300 <sup>a</sup>    | Weight Loss                                        | Categorical | 0: No<br>1: Yes                                                                                                                                                                                                                                                                                                     |
| K0310 <sup>a</sup>    | Weight Gain                                        | Categorical | 0: No<br>1: Yes                                                                                                                                                                                                                                                                                                     |
| K0510A2 <sup>a</sup>  | Parenteral/IV feeding                              | Categorical | 0: No<br>1: Yes                                                                                                                                                                                                                                                                                                     |
| K0510B2 <sup>a</sup>  | Feeding tube                                       | Categorical | 0: No<br>1: Yes                                                                                                                                                                                                                                                                                                     |
| K0510C2 <sup>a</sup>  | Mechanically altered diet                          | Categorical | 0: No<br>1: Yes                                                                                                                                                                                                                                                                                                     |
| L0200A <sup>a</sup>   | Broken or loosely fitting full or partial dentures | Categorical | 0: No<br>1: Yes                                                                                                                                                                                                                                                                                                     |
| L0200B <sup>a</sup>   | No natural teeth or tooth fragments                | Categorical | 0: No<br>1: Yes                                                                                                                                                                                                                                                                                                     |
| L0200C <sup>a</sup>   | Abnormal mouth tissue                              | Categorical | 0: No<br>1: Yes                                                                                                                                                                                                                                                                                                     |
| L0200D <sup>a</sup>   | Obvious or likely cavity or broken natural teeth   | Categorical | 0: No<br>1: Yes                                                                                                                                                                                                                                                                                                     |

|                                  |                                                                                               |             |                                                                                                   |
|----------------------------------|-----------------------------------------------------------------------------------------------|-------------|---------------------------------------------------------------------------------------------------|
| L0200E <sup>a</sup>              | Inflamed or bleeding gums or loose natural teeth                                              | Categorical | 0: No<br>1: Yes                                                                                   |
| L0200F <sup>a</sup>              | Mouth of facial pain, discomfort, or difficulty chewing                                       | Categorical | 0: No<br>1: Yes                                                                                   |
| L0200G <sup>a</sup>              | Unable to examine dentition                                                                   | Categorical | 0: No<br>1: Yes                                                                                   |
| M0100A-C <sup>a</sup>            | Pressure ulcer evaluation                                                                     | Categorical | 0: No<br>1: Yes                                                                                   |
| M0210 <sup>a</sup>               | Unhealed pressure ulcer                                                                       | Categorical | 0: No<br>1: Yes                                                                                   |
| M1040A-H <sup>a</sup>            | Other ulcers, wounds, and skin problems                                                       | Categorical | 0: No<br>1: Yes                                                                                   |
| M1200A-I <sup>a</sup>            | Skin and Ulcer Treatments                                                                     | Categorical | 0: No<br>1: Yes                                                                                   |
| N0350A <sup>a</sup>              | Insulin Use in Last 7 days                                                                    | Categorical | 0: Not administered<br>1: Administered 1-6 days in the last week<br>2: Administered daily         |
| N0410A-G <sup>a</sup>            | Medication Use in Last 7 days                                                                 | Categorical | 0: Not administered<br>1: Administered 1-6 days in the last week<br>2: Administered daily         |
| O0100C2, G2, H2, M2 <sup>a</sup> | Oxygen, BiPAP, IV Medications, or Isolation while a resident                                  | Categorical | 0: No<br>1: Yes                                                                                   |
| O0250A <sup>a</sup>              | Influenza vaccine                                                                             | Categorical | 0: No<br>1: Yes                                                                                   |
| O0300A <sup>a</sup>              | Pneumococcal vaccine                                                                          | Categorical | 0: No<br>1: Yes                                                                                   |
| O0400A4, B4, C4 <sup>a</sup>     | Number of days of therapy (Speech Language Pathology, Physical Therapy, Occupational Therapy) | Categorical | 0: Did not received therapy<br>1: Received 1-4 days of therapy<br>2: Received 5-7 days of therapy |
| O0400D2, E2, F2 <sup>a</sup>     | Number of days of therapy (Respiratory, Psychology, Recreational Therapy)                     | Categorical | 0: Did not receive therapy<br>1: Received at least 1 day of therapy                               |
| O0500A-J <sup>a</sup>            | Days receiving restorative nursing                                                            | Categorical | 0: Never<br>1: At least once, but not daily<br>2: Daily                                           |
| O0600 <sup>a</sup>               | Days physician examined resident                                                              | Categorical | 0: 0 days                                                                                         |

|                           |                                                      |             |                   |
|---------------------------|------------------------------------------------------|-------------|-------------------|
|                           |                                                      |             | 1: 1 to 2 days    |
|                           |                                                      |             | 2: 3 or more days |
| P0100A-H <sup>a</sup>     | Were restraints used?                                | Categorical | 0: No             |
|                           |                                                      |             | 1: Yes            |
| V0200A11A-B <sup>a</sup>  | Fall Care Plan                                       | Categorical | 0: No             |
|                           |                                                      |             | 1: Yes            |
| Hospitalized <sup>c</sup> | Hospitalization in 1 year baseline assessment period | Categorical | 0: No             |
|                           |                                                      |             | 1: Yes            |

Numbers in parentheses denote categories that were combined to create the designated number of categories in the table.

<sup>a</sup>Variables where missing values were coded as “0=no” consistent with the directions in the MDS.

<sup>b</sup>Physical function was measured using Activities of Daily Living (ADL) via the Minimum Data Set Morris 16-point ADL Short Form score. The ADL scores range from 0 to 16, with 0 indicating total independence and 16 indicating total dependence in all ADLs. This score is composed on MDS variables G0110E1, H1, I1, and J1.

<sup>c</sup>Variable obtained from Medicare claims. Any individual with a claim for hospitalization in the 1-year prior to the start of follow-up was assigned “Yes” for this variable with all others assumed to have no hospitalization.



**Supplemental Table S2. Predictors of fall-related injuries included in the final 2-year Fine-Gray sub-distribution hazards regression model (INJURE-NH), development sample.**

| Predictor                           | Code | SHR  | Lower 95% CI | Upper 95% CI | Coefficient | Std Error |
|-------------------------------------|------|------|--------------|--------------|-------------|-----------|
| Age group                           |      |      |              |              |             |           |
| >65 to 75                           | 0    | REF  | REF          | REF          | REF         | REF       |
| >75 to 85                           | 1    | 1.06 | 1.02         | 1.10         | 0.06        | 0.02      |
| >85 to 100                          | 2    | 1.04 | 1.00         | 1.08         | 0.04        | 0.02      |
| ≥100                                | 3    | 0.92 | 0.82         | 1.03         | -0.08       | 0.06      |
| Sex                                 |      |      |              |              |             |           |
| Male                                | 1    | REF  | REF          | REF          | REF         | REF       |
| Female                              | 2    | 1.38 | 1.34         | 1.42         | 0.32        | 0.01      |
| Race                                |      |      |              |              |             |           |
| Native/Other/Unknown                | 0    | 1.51 | 1.34         | 1.71         | 0.41        | 0.06      |
| Non-Hispanic White                  | 1    | 1.56 | 1.48         | 1.64         | 0.45        | 0.03      |
| Black/African American              | 2    | REF  | REF          | REF          | REF         | REF       |
| Asian/Pacific Islander              | 3    | 1.41 | 1.26         | 1.57         | 0.34        | 0.06      |
| Hispanic                            | 4    | 1.62 | 1.51         | 1.75         | 0.48        | 0.04      |
| Visual impairment                   |      |      |              |              |             |           |
| No                                  | 0    | 1.03 | 0.99         | 1.07         | 0.03        | 0.02      |
| Yes                                 | 1    | REF  | REF          | REF          | REF         | REF       |
| Cognitive Function Scale            |      |      |              |              |             |           |
| Intact                              | 1    | 0.99 | 0.92         | 1.06         | -0.01       | 0.04      |
| Mildly Impaired                     | 2    | 1.00 | 0.93         | 1.07         | 0.00        | 0.04      |
| Moderately Impaired                 | 3    | 1.03 | 0.96         | 1.09         | 0.03        | 0.03      |
| Severely Impaired                   | 4    | REF  | REF          | REF          | REF         | REF       |
| ADL Short Form                      |      |      |              |              |             |           |
| 0-8                                 | 0    | 1.23 | 1.11         | 1.35         | 0.20        | 0.05      |
| 9-12                                | 1    | 1.18 | 1.09         | 1.29         | 0.17        | 0.04      |
| 13-16                               | 2    | REF  | REF          | REF          | REF         | REF       |
| Orthostatic Hypotension             |      |      |              |              |             |           |
| No                                  | 0    | REF  | REF          | REF          | REF         | REF       |
| Yes                                 | 1    | 1.13 | 1.04         | 1.23         | 0.12        | 0.04      |
| Diabetes mellitus                   |      |      |              |              |             |           |
| No                                  | 0    | REF  | REF          | REF          | REF         | REF       |
| Yes                                 | 1    | 1.03 | 1.00         | 1.05         | 0.03        | 0.01      |
| Hip fracture                        |      |      |              |              |             |           |
| No                                  | 0    | REF  | REF          | REF          | REF         | REF       |
| Yes                                 | 1    | 1.41 | 1.32         | 1.49         | 0.34        | 0.03      |
| Recent fall                         |      |      |              |              |             |           |
| No fall                             | 0    | REF  | REF          | REF          | REF         | REF       |
| Fell without injury                 | 1    | 1.40 | 1.36         | 1.44         | 0.33        | 0.01      |
| Fall resulting in injury            | 2    | 1.66 | 1.61         | 1.71         | 0.50        | 0.02      |
| Newly admitted in previous 100 days |      |      |              |              |             |           |
| No                                  | 0    | REF  | REF          | REF          | REF         | REF       |
| Yes                                 | 1    | 1.33 | 1.29         | 1.37         | 0.29        | 0.02      |
| Depression (combined)               |      |      |              |              |             |           |
| Minimal                             | 0    | REF  | REF          | REF          | REF         | REF       |
| Mild                                | 1    | 1.03 | 1.00         | 1.07         | 0.03        | 0.02      |
| Moderate to Severe                  | 2    | 1.08 | 1.02         | 1.14         | 0.07        | 0.03      |

|                                            |   |      |      |      |       |      |
|--------------------------------------------|---|------|------|------|-------|------|
| Body Mass Index <sup>a</sup>               |   |      |      |      |       |      |
| Underweight (15 ≤ BMI ≤ 18.5)              | 0 | 1.05 | 1.01 | 1.10 | 0.05  | 0.02 |
| Normal weight (18.5 < BMI ≤ 25)            | 1 | REF  | REF  | REF  | REF   | REF  |
| Overweight (25 < BMI ≤ 30)                 | 2 | 0.85 | 0.82 | 0.87 | -0.17 | 0.01 |
| Obesity Class I (30 < BMI ≤ 35)            | 3 | 0.74 | 0.71 | 0.77 | -0.30 | 0.02 |
| Obesity Class II/III (35 < BMI ≤ 45)       | 4 | 0.67 | 0.63 | 0.70 | -0.41 | 0.03 |
| Implausible (BMI < 15 or > 45)             | 5 | 0.78 | 0.72 | 0.84 | -0.25 | 0.04 |
| Makes self understood                      |   |      |      |      |       |      |
| No                                         | 0 | 1.05 | 1.00 | 1.10 | 0.05  | 0.02 |
| Yes                                        | 1 | REF  | REF  | REF  | REF   | REF  |
| Disorganized thinking                      |   |      |      |      |       |      |
| No                                         | 0 | REF  | REF  | REF  | REF   | REF  |
| Yes                                        | 1 | 1.13 | 0.95 | 1.35 | 0.13  | 0.09 |
| Should mood interview be conducted         |   |      |      |      |       |      |
| No                                         | 0 | REF  | REF  | REF  | REF   | REF  |
| Yes                                        | 1 | 0.98 | 0.92 | 1.03 | -0.03 | 0.03 |
| Behavioral symptoms put individual at risk |   |      |      |      |       |      |
| No                                         | 0 | REF  | REF  | REF  | REF   | REF  |
| Yes                                        | 1 | 1.10 | 1.00 | 1.21 | 0.09  | 0.05 |
| Behavioral symptoms interfere with care    |   |      |      |      |       |      |
| No                                         | 0 | REF  | REF  | REF  | REF   | REF  |
| Yes                                        | 1 | 0.95 | 0.88 | 1.02 | -0.06 | 0.04 |
| Wandering                                  |   |      |      |      |       |      |
| No                                         | 0 | REF  | REF  | REF  | REF   | REF  |
| Yes                                        | 1 | 1.26 | 1.20 | 1.32 | 0.23  | 0.02 |
| Wandering intrudes on privacy              |   |      |      |      |       |      |
| No                                         | 0 | REF  | REF  | REF  | REF   | REF  |
| Yes                                        | 1 | 1.07 | 0.99 | 1.16 | 0.07  | 0.04 |
| Change in behavior                         |   |      |      |      |       |      |
| Same                                       | 0 | REF  | REF  | REF  | REF   | REF  |
| Improved                                   | 1 | 1.07 | 1.00 | 1.16 | 0.07  | 0.04 |
| Worse                                      | 2 | 1.07 | 0.99 | 1.14 | 0.06  | 0.04 |
| N/A                                        | 3 | 1.02 | 0.99 | 1.05 | 0.02  | 0.01 |
| Transfer - support                         |   |      |      |      |       |      |
| No setup or help                           | 0 | 1.17 | 1.09 | 1.26 | 0.16  | 0.04 |
| Setup help only                            | 1 | 1.16 | 1.09 | 1.23 | 0.15  | 0.03 |
| One person assist                          | 2 | 1.21 | 1.17 | 1.26 | 0.19  | 0.02 |
| Two+ people assist                         | 3 | REF  | REF  | REF  | REF   | REF  |
| Walk in room - self-performance            |   |      |      |      |       |      |
| Independent                                | 0 | 1.37 | 1.27 | 1.47 | 0.31  | 0.04 |
| Supervision                                | 1 | 1.33 | 1.25 | 1.41 | 0.28  | 0.03 |
| Limited assistance                         | 2 | 1.28 | 1.22 | 1.34 | 0.24  | 0.02 |
| Extensive assistance                       | 3 | 1.24 | 1.18 | 1.29 | 0.21  | 0.02 |
| Total dependence                           | 4 | REF  | REF  | REF  | REF   | REF  |
| Walk in corridor - support                 |   |      |      |      |       |      |
| No setup or help                           | 0 | 1.14 | 1.05 | 1.22 | 0.13  | 0.04 |
| Setup help only                            | 1 | 1.16 | 1.09 | 1.23 | 0.15  | 0.03 |
| One person assist                          | 2 | 1.10 | 1.06 | 1.15 | 0.10  | 0.02 |

|                                        |   |      |      |      |       |      |
|----------------------------------------|---|------|------|------|-------|------|
| Two+ people assist                     | 3 | REF  | REF  | REF  | REF   | REF  |
| Locomotion on unit - self-performance  |   |      |      |      |       |      |
| Independent                            | 0 | 1.13 | 1.02 | 1.26 | 0.12  | 0.05 |
| Supervision                            | 1 | 1.18 | 1.09 | 1.29 | 0.17  | 0.04 |
| Limited assistance                     | 2 | 1.22 | 1.13 | 1.32 | 0.20  | 0.04 |
| Extensive assistance                   | 3 | 1.08 | 1.01 | 1.15 | 0.08  | 0.03 |
| Total dependence                       | 4 | REF  | REF  | REF  | REF   | REF  |
| Locomotion on unit - support           |   |      |      |      |       |      |
| No setup or help                       | 0 | 1.06 | 0.94 | 1.18 | 0.05  | 0.06 |
| Setup help only                        | 1 | 1.10 | 0.99 | 1.21 | 0.09  | 0.05 |
| One person assist                      | 2 | 1.07 | 0.99 | 1.15 | 0.06  | 0.04 |
| Two+ people assist                     | 3 | REF  | REF  | REF  | REF   | REF  |
| Locomotion off unit - self-performance |   |      |      |      |       |      |
| Independent                            | 0 | 1.07 | 0.98 | 1.16 | 0.06  | 0.04 |
| Supervision                            | 1 | 1.06 | 1.00 | 1.13 | 0.06  | 0.03 |
| Limited assistance                     | 2 | 1.04 | 0.99 | 1.10 | 0.04  | 0.03 |
| Extensive assistance                   | 3 | 1.06 | 1.02 | 1.11 | 0.06  | 0.02 |
| Total dependence                       | 4 | REF  | REF  | REF  | REF   | REF  |
| Locomotion off unit - support          |   |      |      |      |       |      |
| No setup or help                       | 0 | 1.00 | 0.92 | 1.10 | 0.00  | 0.04 |
| Setup help only                        | 1 | 0.95 | 0.88 | 1.03 | -0.05 | 0.04 |
| One person assist                      | 2 | 0.99 | 0.94 | 1.05 | -0.01 | 0.03 |
| Two+ people assist                     | 3 | REF  | REF  | REF  | REF   | REF  |
| Dressing - self-performance            |   |      |      |      |       |      |
| Independent                            | 0 | 0.99 | 0.90 | 1.09 | -0.01 | 0.05 |
| Supervision                            | 1 | 0.97 | 0.89 | 1.06 | -0.03 | 0.04 |
| Limited assistance                     | 2 | 1.03 | 0.96 | 1.12 | 0.03  | 0.04 |
| Extensive assistance                   | 3 | 0.98 | 0.91 | 1.05 | -0.02 | 0.04 |
| Total dependence                       | 4 | REF  | REF  | REF  | REF   | REF  |
| Eating - self-performance              |   |      |      |      |       |      |
| Independent                            | 0 | 1.20 | 1.08 | 1.34 | 0.18  | 0.06 |
| Supervision                            | 1 | 1.19 | 1.07 | 1.33 | 0.18  | 0.05 |
| Limited assistance                     | 2 | 1.21 | 1.09 | 1.35 | 0.19  | 0.06 |
| Extensive assistance                   | 3 | 1.07 | 0.97 | 1.19 | 0.07  | 0.05 |
| Total dependence                       | 4 | REF  | REF  | REF  | REF   | REF  |
| Limited ROM - upper extremity          |   |      |      |      |       |      |
| No impairment                          | 0 | REF  | REF  | REF  | REF   | REF  |
| Impairment on one side                 | 1 | 1.01 | 0.96 | 1.05 | 0.01  | 0.02 |
| Impairment on two sides                | 2 | 0.97 | 0.91 | 1.03 | -0.03 | 0.03 |
| Limited ROM - lower extremity          |   |      |      |      |       |      |
| No impairment                          | 0 | REF  | REF  | REF  | REF   | REF  |
| Impairment on one side                 | 1 | 1.07 | 1.03 | 1.12 | 0.07  | 0.02 |
| Impairment on two sides                | 2 | 0.95 | 0.91 | 0.99 | -0.05 | 0.02 |
| Cane/crutch                            |   |      |      |      |       |      |
| No                                     | 0 | REF  | REF  | REF  | REF   | REF  |
| Yes                                    | 1 | 1.11 | 1.03 | 1.19 | 0.10  | 0.04 |
| Walker                                 |   |      |      |      |       |      |
| No                                     | 0 | REF  | REF  | REF  | REF   | REF  |
| Yes                                    | 1 | 0.99 | 0.96 | 1.02 | -0.01 | 0.02 |

|                                           |   |      |      |      |       |      |
|-------------------------------------------|---|------|------|------|-------|------|
| Wheelchair                                |   |      |      |      |       |      |
| No                                        | 0 | REF  | REF  | REF  | REF   | REF  |
| Yes                                       | 1 | 0.92 | 0.89 | 0.95 | -0.09 | 0.02 |
| Ostomy                                    |   |      |      |      |       |      |
| No                                        | 0 | REF  | REF  | REF  | REF   | REF  |
| Yes                                       | 1 | 1.01 | 0.85 | 1.21 | 0.01  | 0.09 |
| Urinary continence                        |   |      |      |      |       |      |
| Always continent                          | 0 | 1.34 | 1.26 | 1.42 | 0.29  | 0.03 |
| Occasionally incontinent                  | 1 | 1.31 | 1.24 | 1.39 | 0.27  | 0.03 |
| Frequently incontinent                    | 2 | 1.11 | 1.05 | 1.17 | 0.10  | 0.03 |
| Always incontinent                        | 3 | REF  | REF  | REF  | REF   | REF  |
| Not rated                                 | 9 | 0.99 | 0.92 | 1.07 | -0.01 | 0.04 |
| Bowel continence                          |   |      |      |      |       |      |
| Always continent                          | 0 | 1.03 | 0.97 | 1.09 | 0.03  | 0.03 |
| Occasionally incontinent                  | 1 | 1.04 | 0.97 | 1.10 | 0.03  | 0.03 |
| Frequently incontinent                    | 2 | 1.02 | 0.97 | 1.08 | 0.02  | 0.03 |
| Always incontinent                        | 3 | REF  | REF  | REF  | REF   | REF  |
| Not rated                                 | 9 | 0.86 | 0.72 | 1.04 | -0.15 | 0.10 |
| Cancer                                    |   |      |      |      |       |      |
| No                                        | 0 | REF  | REF  | REF  | REF   | REF  |
| Yes                                       | 1 | 0.89 | 0.85 | 0.94 | -0.11 | 0.03 |
| GERD/Ulcer                                |   |      |      |      |       |      |
| No                                        | 0 | REF  | REF  | REF  | REF   | REF  |
| Yes                                       | 1 | 1.06 | 1.04 | 1.09 | 0.06  | 0.01 |
| UTI in last 30 days                       |   |      |      |      |       |      |
| No                                        | 0 | REF  | REF  | REF  | REF   | REF  |
| Yes                                       | 1 | 1.06 | 1.00 | 1.11 | 0.06  | 0.03 |
| Arthritis                                 |   |      |      |      |       |      |
| No                                        | 0 | REF  | REF  | REF  | REF   | REF  |
| Yes                                       | 1 | 0.98 | 0.95 | 1.00 | -0.02 | 0.01 |
| Other fracture                            |   |      |      |      |       |      |
| No                                        | 0 | REF  | REF  | REF  | REF   | REF  |
| Yes                                       | 1 | 1.69 | 1.61 | 1.77 | 0.52  | 0.02 |
| Aphasia                                   |   |      |      |      |       |      |
| No                                        | 0 | REF  | REF  | REF  | REF   | REF  |
| Yes                                       | 1 | 0.91 | 0.85 | 0.99 | -0.09 | 0.04 |
| Cerebral palsy                            |   |      |      |      |       |      |
| No                                        | 0 | REF  | REF  | REF  | REF   | REF  |
| Yes                                       | 1 | 0.60 | 0.45 | 0.79 | -0.52 | 0.14 |
| Malnutrition                              |   |      |      |      |       |      |
| No                                        | 0 | REF  | REF  | REF  | REF   | REF  |
| Yes                                       | 1 | 1.05 | 0.99 | 1.13 | 0.05  | 0.03 |
| Schizophrenia                             |   |      |      |      |       |      |
| No                                        | 0 | REF  | REF  | REF  | REF   | REF  |
| Yes                                       | 1 | 0.88 | 0.83 | 0.93 | -0.13 | 0.03 |
| Cataracts, glaucoma, macular degeneration |   |      |      |      |       |      |
| No                                        | 0 | REF  | REF  | REF  | REF   | REF  |
| Yes                                       | 1 | 0.97 | 0.94 | 1.01 | -0.03 | 0.02 |

|                                                   |   |      |      |      |       |      |
|---------------------------------------------------|---|------|------|------|-------|------|
| Dyspnea at rest                                   |   |      |      |      |       |      |
| No                                                | 0 | 1.17 | 1.07 | 1.27 | 0.15  | 0.04 |
| Yes                                               | 1 | REF  | REF  | REF  | REF   | REF  |
| <6month life expectancy?                          |   |      |      |      |       |      |
| No                                                | 0 | 1.48 | 1.14 | 1.91 | 0.39  | 0.13 |
| Yes                                               | 1 | REF  | REF  | REF  | REF   | REF  |
| Mechanically altered diet                         |   |      |      |      |       |      |
| No                                                | 0 | 1.05 | 1.02 | 1.07 | 0.04  | 0.01 |
| Yes                                               | 1 | REF  | REF  | REF  | REF   | REF  |
| Skin tear                                         |   |      |      |      |       |      |
| No                                                | 0 | REF  | REF  | REF  | REF   | REF  |
| Yes                                               | 1 | 1.11 | 1.05 | 1.16 | 0.10  | 0.02 |
| Pressure-reducing device for chair                |   |      |      |      |       |      |
| No                                                | 0 | 1.08 | 1.05 | 1.11 | 0.08  | 0.01 |
| Yes                                               | 1 | REF  | REF  | REF  | REF   | REF  |
| Pressure-reducing device for bed                  |   |      |      |      |       |      |
| No                                                | 0 | 1.03 | 1.00 | 1.07 | 0.03  | 0.02 |
| Yes                                               | 1 | REF  | REF  | REF  | REF   | REF  |
| Application of ointments/skin meds                |   |      |      |      |       |      |
| No                                                | 0 | 1.05 | 1.02 | 1.07 | 0.05  | 0.01 |
| Yes                                               | 1 | REF  | REF  | REF  | REF   | REF  |
| Days receiving antianxiety treatment in last 7    |   |      |      |      |       |      |
| Not administered                                  | 0 | REF  | REF  | REF  | REF   | REF  |
| Administered 1-6 days                             | 1 | 1.16 | 1.10 | 1.21 | 0.14  | 0.03 |
| Administered daily                                | 2 | 1.11 | 1.08 | 1.15 | 0.11  | 0.02 |
| Days receiving antidepressant treatment in last 7 |   |      |      |      |       |      |
| Not administered                                  | 0 | REF  | REF  | REF  | REF   | REF  |
| Administered 1-6 days                             | 1 | 1.19 | 1.12 | 1.27 | 0.18  | 0.03 |
| Administered daily                                | 2 | 1.17 | 1.14 | 1.20 | 0.16  | 0.01 |
| Days receiving hypnotic treatment in last 7       |   |      |      |      |       |      |
| Not administered                                  | 0 | REF  | REF  | REF  | REF   | REF  |
| Administered 1-6 days                             | 1 | 1.10 | 0.99 | 1.23 | 0.10  | 0.05 |
| Administered daily                                | 2 | 1.11 | 1.04 | 1.19 | 0.11  | 0.03 |
| Days receiving anticoagulant treatment in last 7  |   |      |      |      |       |      |
| Not administered                                  | 0 | REF  | REF  | REF  | REF   | REF  |
| Administered 1-6 days                             | 1 | 1.16 | 1.07 | 1.25 | 0.14  | 0.04 |
| Administered daily                                | 2 | 1.09 | 1.05 | 1.13 | 0.09  | 0.02 |
| Days receiving antibiotic treatment in last 7     |   |      |      |      |       |      |
| Not administered                                  | 0 | REF  | REF  | REF  | REF   | REF  |
| Administered 1-6 days                             | 1 | 1.04 | 0.99 | 1.09 | 0.04  | 0.02 |
| Administered daily                                | 2 | 1.11 | 1.05 | 1.17 | 0.10  | 0.03 |
| Days receiving diuretic treatment in last 7       |   |      |      |      |       |      |
| Not administered                                  | 0 | REF  | REF  | REF  | REF   | REF  |
| Administered 1-6 days                             | 1 | 0.97 | 0.91 | 1.03 | -0.03 | 0.03 |
| Administered daily                                | 2 | 0.96 | 0.94 | 0.99 | -0.04 | 0.01 |

|                                                 |   |      |      |      |      |      |
|-------------------------------------------------|---|------|------|------|------|------|
| Received oxygen therapy while admitted          |   |      |      |      |      |      |
| No                                              | 0 | 1.06 | 1.02 | 1.10 | 0.06 | 0.02 |
| Yes                                             | 1 | REF  | REF  | REF  | REF  | REF  |
| Received most recent influenza vaccine          |   |      |      |      |      |      |
| No                                              | 0 | 1.08 | 1.05 | 1.11 | 0.07 | 0.01 |
| Yes                                             | 1 | REF  | REF  | REF  | REF  | REF  |
| Days receiving SLP therapy in last 7            |   |      |      |      |      |      |
| Not administered                                | 0 | REF  | REF  | REF  | REF  | REF  |
| Administered 1-6 days                           | 1 | 1.02 | 0.98 | 1.05 | 0.02 | 0.02 |
| Administered daily                              | 2 | 1.08 | 1.04 | 1.11 | 0.08 | 0.02 |
| Days receiving OT therapy in last 7             |   |      |      |      |      |      |
| Not administered                                | 0 | REF  | REF  | REF  | REF  | REF  |
| Administered 1-6 days                           | 1 | 1.06 | 1.02 | 1.11 | 0.06 | 0.02 |
| Administered daily                              | 2 | 1.08 | 1.03 | 1.12 | 0.07 | 0.02 |
| Days receiving PT therapy in last 7             |   |      |      |      |      |      |
| Not administered                                | 0 | REF  | REF  | REF  | REF  | REF  |
| Administered 1-6 days                           | 1 | 1.04 | 1.00 | 1.09 | 0.04 | 0.02 |
| Administered daily                              | 2 | 1.07 | 1.03 | 1.12 | 0.07 | 0.02 |
| Days receiving passive ROM therapy in last 7    |   |      |      |      |      |      |
| Not administered                                | 0 | 1.21 | 1.07 | 1.37 | 0.19 | 0.06 |
| Administered 1-6 days                           | 1 | 1.02 | 0.89 | 1.18 | 0.02 | 0.07 |
| Administered daily                              | 2 | REF  | REF  | REF  | REF  | REF  |
| Days receiving therapy for eating/swallowing    |   |      |      |      |      |      |
| Not administered                                | 0 | 1.18 | 1.07 | 1.30 | 0.16 | 0.05 |
| Administered at least once                      | 1 | REF  | REF  | REF  | REF  | REF  |
| Decision care planning for falls triggered      |   |      |      |      |      |      |
| No                                              | 0 | REF  | REF  | REF  | REF  | REF  |
| Yes                                             | 1 | 1.01 | 0.96 | 1.06 | 0.01 | 0.03 |
| Hospitalization in 1-year baseline <sup>b</sup> |   |      |      |      |      |      |
| No                                              | 0 | REF  | REF  | REF  | REF  | REF  |
| Yes                                             | 1 | 1.15 | 1.12 | 1.19 | 0.14 | 0.02 |

Abbreviations: CI, Confidence Interval; SHR, Sub-distribution Hazard Ratio

<sup>a</sup>Body Mass Index classifications are derived from World Health Organization classifications

<sup>b</sup>Obtained from Medicare claims

**Supplemental Table S3. Predictors of fall-related injuries included in the final 2-year Fine-Gray sub-distribution hazards regression model (INJURE-NH), validation sample.**

| Predictor                           | Code | SHR  | Lower 95% CI | Upper 95% CI | Coefficient | Std Error |
|-------------------------------------|------|------|--------------|--------------|-------------|-----------|
| Age group                           |      |      |              |              |             |           |
| >65 to 75                           | 0    | REF  | REF          | REF          | REF         | REF       |
| >75 to 85                           | 1    | 1.06 | 1.01         | 1.12         | 0.06        | 0.03      |
| >85 to 100                          | 2    | 1.05 | 1.00         | 1.11         | 0.05        | 0.03      |
| ≥100                                | 3    | 0.86 | 0.74         | 1.00         | -0.15       | 0.08      |
| Sex                                 |      |      |              |              |             |           |
| Male                                | 1    | REF  | REF          | REF          | REF         | REF       |
| Female                              | 2    | 1.38 | 1.32         | 1.43         | 0.32        | 0.02      |
| Race                                |      |      |              |              |             |           |
| Native/Other/Unknown                | 0    | 1.37 | 1.14         | 1.64         | 0.31        | 0.09      |
| Non-Hispanic White                  | 1    | 1.59 | 1.48         | 1.71         | 0.46        | 0.04      |
| Black/African American              | 2    | REF  | REF          | REF          | REF         | REF       |
| Asian/Pacific Islander              | 3    | 1.27 | 1.08         | 1.49         | 0.23        | 0.08      |
| Hispanic                            | 4    | 1.71 | 1.55         | 1.90         | 0.54        | 0.05      |
| Visual impairment                   |      |      |              |              |             |           |
| No                                  | 0    | 1.05 | 0.99         | 1.11         | 0.05        | 0.03      |
| Yes                                 | 1    | REF  | REF          | REF          | REF         | REF       |
| Cognitive Function Scale            |      |      |              |              |             |           |
| Intact                              | 1    | 0.95 | 0.87         | 1.05         | -0.05       | 0.05      |
| Mildly Impaired                     | 2    | 0.99 | 0.90         | 1.10         | -0.01       | 0.05      |
| Moderately Impaired                 | 3    | 1.01 | 0.93         | 1.11         | 0.01        | 0.04      |
| Severely Impaired                   | 4    | REF  | REF          | REF          | REF         | REF       |
| ADL Short Form                      |      |      |              |              |             |           |
| 0-8                                 | 0    | 1.27 | 1.10         | 1.47         | 0.24        | 0.07      |
| 9-12                                | 1    | 1.26 | 1.12         | 1.42         | 0.23        | 0.06      |
| 13-16                               | 2    | REF  | REF          | REF          | REF         | REF       |
| Orthostatic Hypotension             |      |      |              |              |             |           |
| No                                  | 0    | REF  | REF          | REF          | REF         | REF       |
| Yes                                 | 1    | 1.16 | 1.03         | 1.31         | 0.15        | 0.06      |
| Diabetes mellitus                   |      |      |              |              |             |           |
| No                                  | 0    | REF  | REF          | REF          | REF         | REF       |
| Yes                                 | 1    | 1.03 | 0.99         | 1.06         | 0.03        | 0.02      |
| Hip fracture                        |      |      |              |              |             |           |
| No                                  | 0    | REF  | REF          | REF          | REF         | REF       |
| Yes                                 | 1    | 1.31 | 1.20         | 1.43         | 0.27        | 0.04      |
| Recent fall                         |      |      |              |              |             |           |
| No fall                             | 0    | REF  | REF          | REF          | REF         | REF       |
| Fell without injury                 | 1    | 1.34 | 1.29         | 1.39         | 0.29        | 0.02      |
| Fall resulting in injury            | 2    | 1.55 | 1.48         | 1.61         | 0.43        | 0.02      |
| Newly admitted in previous 100 days |      |      |              |              |             |           |
| No                                  | 0    | REF  | REF          | REF          | REF         | REF       |
| Yes                                 | 1    | 1.31 | 1.25         | 1.37         | 0.27        | 0.02      |
| Depression (combined)               |      |      |              |              |             |           |
| Minimal                             | 0    | REF  | REF          | REF          | REF         | REF       |
| Mild                                | 1    | 1.04 | 0.99         | 1.09         | 0.04        | 0.02      |
| Moderate to Severe                  | 2    | 1.03 | 0.95         | 1.11         | 0.03        | 0.04      |

|                                            |   |      |      |      |       |      |
|--------------------------------------------|---|------|------|------|-------|------|
| Body Mass Index <sup>a</sup>               |   |      |      |      |       |      |
| Underweight (15 ≤ BMI ≤ 18.5)              | 0 | 1.16 | 1.09 | 1.23 | 0.14  | 0.03 |
| Normal weight (18.5 < BMI ≤ 25)            | 1 | REF  | REF  | REF  | REF   | REF  |
| Overweight (25 < BMI ≤ 30)                 | 2 | 0.82 | 0.79 | 0.86 | -0.19 | 0.02 |
| Obesity Class I (30 < BMI ≤ 35)            | 3 | 0.72 | 0.68 | 0.76 | -0.33 | 0.03 |
| Obesity Class II/III (35 < BMI ≤ 45)       | 4 | 0.72 | 0.67 | 0.77 | -0.33 | 0.04 |
| Implausible (BMI < 15 or > 45)             | 5 | 0.75 | 0.67 | 0.84 | -0.29 | 0.06 |
| Makes self understood                      |   |      |      |      |       |      |
| No                                         | 0 | 0.98 | 0.92 | 1.05 | -0.02 | 0.03 |
| Yes                                        | 1 | REF  | REF  | REF  | REF   | REF  |
| Disorganized thinking                      |   |      |      |      |       |      |
| No                                         | 0 | REF  | REF  | REF  | REF   | REF  |
| Yes                                        | 1 | 1.30 | 1.02 | 1.65 | 0.26  | 0.12 |
| Should mood interview be conducted         |   |      |      |      |       |      |
| No                                         | 0 | REF  | REF  | REF  | REF   | REF  |
| Yes                                        | 1 | 1.02 | 0.94 | 1.10 | 0.02  | 0.04 |
| Behavioral symptoms put individual at risk |   |      |      |      |       |      |
| No                                         | 0 | REF  | REF  | REF  | REF   | REF  |
| Yes                                        | 1 | 1.09 | 0.96 | 1.24 | 0.09  | 0.06 |
| Behavioral symptoms interfere with care    |   |      |      |      |       |      |
| No                                         | 0 | REF  | REF  | REF  | REF   | REF  |
| Yes                                        | 1 | 1.01 | 0.91 | 1.12 | 0.01  | 0.05 |
| Wandering                                  |   |      |      |      |       |      |
| No                                         | 0 | REF  | REF  | REF  | REF   | REF  |
| Yes                                        | 1 | 1.20 | 1.13 | 1.28 | 0.19  | 0.03 |
| Wandering intrudes on privacy              |   |      |      |      |       |      |
| No                                         | 0 | REF  | REF  | REF  | REF   | REF  |
| Yes                                        | 1 | 1.19 | 1.07 | 1.33 | 0.17  | 0.06 |
| Change in behavior                         |   |      |      |      |       |      |
| Same                                       | 0 | REF  | REF  | REF  | REF   | REF  |
| Improved                                   | 1 | 1.10 | 0.99 | 1.23 | 0.10  | 0.05 |
| Worse                                      | 2 | 1.04 | 0.94 | 1.15 | 0.04  | 0.05 |
| N/A                                        | 3 | 1.01 | 0.97 | 1.05 | 0.01  | 0.02 |
| Transfer - support                         |   |      |      |      |       |      |
| No setup or help                           | 0 | 1.19 | 1.08 | 1.32 | 0.18  | 0.05 |
| Setup help only                            | 1 | 1.16 | 1.06 | 1.27 | 0.15  | 0.04 |
| One person assist                          | 2 | 1.16 | 1.11 | 1.22 | 0.15  | 0.03 |
| Two+ people assist                         | 3 | REF  | REF  | REF  | REF   | REF  |
| Walk in room - self-performance            |   |      |      |      |       |      |
| Independent                                | 0 | 1.33 | 1.20 | 1.48 | 0.28  | 0.05 |
| Supervision                                | 1 | 1.34 | 1.23 | 1.46 | 0.30  | 0.04 |
| Limited assistance                         | 2 | 1.25 | 1.17 | 1.34 | 0.22  | 0.03 |
| Extensive assistance                       | 3 | 1.17 | 1.10 | 1.24 | 0.15  | 0.03 |
| Total dependence                           | 4 | REF  | REF  | REF  | REF   | REF  |
| Walk in corridor - support                 |   |      |      |      |       |      |
| No setup or help                           | 0 | 1.07 | 0.96 | 1.18 | 0.06  | 0.05 |
| Setup help only                            | 1 | 1.20 | 1.09 | 1.31 | 0.18  | 0.05 |
| One person assist                          | 2 | 1.11 | 1.05 | 1.17 | 0.10  | 0.03 |



|                                        |   |      |      |      |       |      |
|----------------------------------------|---|------|------|------|-------|------|
| Two+ people assist                     | 3 | REF  | REF  | REF  | REF   | REF  |
| Locomotion on unit - self-performance  |   |      |      |      |       |      |
| Independent                            | 0 | 1.35 | 1.17 | 1.57 | 0.30  | 0.08 |
| Supervision                            | 1 | 1.35 | 1.19 | 1.52 | 0.30  | 0.06 |
| Limited assistance                     | 2 | 1.29 | 1.16 | 1.44 | 0.26  | 0.05 |
| Extensive assistance                   | 3 | 1.15 | 1.05 | 1.26 | 0.14  | 0.05 |
| Total dependence                       | 4 | REF  | REF  | REF  | REF   | REF  |
| Locomotion on unit - support           |   |      |      |      |       |      |
| No setup or help                       | 0 | 1.06 | 0.91 | 1.25 | 0.06  | 0.08 |
| Setup help only                        | 1 | 1.05 | 0.92 | 1.21 | 0.05  | 0.07 |
| One person assist                      | 2 | 1.07 | 0.96 | 1.20 | 0.07  | 0.06 |
| Two+ people assist                     | 3 | REF  | REF  | REF  | REF   | REF  |
| Locomotion off unit - self-performance |   |      |      |      |       |      |
| Independent                            | 0 | 1.09 | 0.97 | 1.23 | 0.09  | 0.06 |
| Supervision                            | 1 | 1.07 | 0.98 | 1.16 | 0.06  | 0.04 |
| Limited assistance                     | 2 | 1.12 | 1.03 | 1.20 | 0.11  | 0.04 |
| Extensive assistance                   | 3 | 1.10 | 1.03 | 1.17 | 0.09  | 0.03 |
| Total dependence                       | 4 | REF  | REF  | REF  | REF   | REF  |
| Locomotion off unit - support          |   |      |      |      |       |      |
| No setup or help                       | 0 | 0.96 | 0.84 | 1.09 | -0.04 | 0.06 |
| Setup help only                        | 1 | 0.96 | 0.85 | 1.07 | -0.05 | 0.06 |
| One person assist                      | 2 | 0.98 | 0.90 | 1.06 | -0.03 | 0.04 |
| Two+ people assist                     | 3 | REF  | REF  | REF  | REF   | REF  |
| Dressing - self-performance            |   |      |      |      |       |      |
| Independent                            | 0 | 0.84 | 0.74 | 0.96 | -0.17 | 0.07 |
| Supervision                            | 1 | 0.78 | 0.69 | 0.88 | -0.25 | 0.06 |
| Limited assistance                     | 2 | 0.93 | 0.83 | 1.04 | -0.07 | 0.06 |
| Extensive assistance                   | 3 | 0.88 | 0.80 | 0.97 | -0.13 | 0.05 |
| Total dependence                       | 4 | REF  | REF  | REF  | REF   | REF  |
| Eating - self-performance              |   |      |      |      |       |      |
| Independent                            | 0 | 1.24 | 1.06 | 1.46 | 0.22  | 0.08 |
| Supervision                            | 1 | 1.25 | 1.07 | 1.46 | 0.22  | 0.08 |
| Limited assistance                     | 2 | 1.25 | 1.07 | 1.47 | 0.23  | 0.08 |
| Extensive assistance                   | 3 | 1.22 | 1.05 | 1.41 | 0.20  | 0.07 |
| Total dependence                       | 4 | REF  | REF  | REF  | REF   | REF  |
| Limited ROM - upper extremity          |   |      |      |      |       |      |
| No impairment                          | 0 | REF  | REF  | REF  | REF   | REF  |
| Impairment on one side                 | 1 | 1.03 | 0.97 | 1.10 | 0.03  | 0.03 |
| Impairment on two sides                | 2 | 1.00 | 0.92 | 1.09 | 0.00  | 0.04 |
| Limited ROM - lower extremity          |   |      |      |      |       |      |
| No impairment                          | 0 | REF  | REF  | REF  | REF   | REF  |
| Impairment on one side                 | 1 | 1.02 | 0.96 | 1.08 | 0.02  | 0.03 |
| Impairment on two sides                | 2 | 0.92 | 0.86 | 0.98 | -0.08 | 0.03 |
| Cane/crutch                            |   |      |      |      |       |      |
| No                                     | 0 | REF  | REF  | REF  | REF   | REF  |
| Yes                                    | 1 | 1.01 | 0.91 | 1.13 | 0.01  | 0.06 |
| Walker                                 |   |      |      |      |       |      |
| No                                     | 0 | REF  | REF  | REF  | REF   | REF  |
| Yes                                    | 1 | 1.02 | 0.97 | 1.06 | 0.01  | 0.02 |

|                                           |   |      |      |      |       |      |
|-------------------------------------------|---|------|------|------|-------|------|
| Wheelchair                                |   |      |      |      |       |      |
| No                                        | 0 | REF  | REF  | REF  | REF   | REF  |
| Yes                                       | 1 | 0.91 | 0.86 | 0.95 | -0.10 | 0.03 |
| Ostomy                                    |   |      |      |      |       |      |
| No                                        | 0 | REF  | REF  | REF  | REF   | REF  |
| Yes                                       | 1 | 1.11 | 0.88 | 1.40 | 0.11  | 0.12 |
| Urinary continence                        |   |      |      |      |       |      |
| Always continent                          | 0 | 1.37 | 1.26 | 1.49 | 0.32  | 0.04 |
| Occasionally incontinent                  | 1 | 1.36 | 1.25 | 1.47 | 0.31  | 0.04 |
| Frequently incontinent                    | 2 | 1.14 | 1.06 | 1.22 | 0.13  | 0.04 |
| Always incontinent                        | 3 | REF  | REF  | REF  | REF   | REF  |
| Not rated                                 | 9 | 0.97 | 0.86 | 1.08 | -0.04 | 0.06 |
| Bowel continence                          |   |      |      |      |       |      |
| Always continent                          | 0 | 1.04 | 0.96 | 1.13 | 0.04  | 0.04 |
| Occasionally incontinent                  | 1 | 1.11 | 1.02 | 1.20 | 0.10  | 0.04 |
| Frequently incontinent                    | 2 | 1.08 | 1.00 | 1.16 | 0.07  | 0.04 |
| Always incontinent                        | 3 | REF  | REF  | REF  | REF   | REF  |
| Not rated                                 | 9 | 0.87 | 0.68 | 1.12 | -0.14 | 0.13 |
| Cancer                                    |   |      |      |      |       |      |
| No                                        | 0 | REF  | REF  | REF  | REF   | REF  |
| Yes                                       | 1 | 0.96 | 0.89 | 1.03 | -0.05 | 0.04 |
| GERD/Ulcer                                |   |      |      |      |       |      |
| No                                        | 0 | REF  | REF  | REF  | REF   | REF  |
| Yes                                       | 1 | 1.04 | 1.01 | 1.08 | 0.04  | 0.02 |
| UTI in last 30 days                       |   |      |      |      |       |      |
| No                                        | 0 | REF  | REF  | REF  | REF   | REF  |
| Yes                                       | 1 | 1.05 | 0.97 | 1.13 | 0.05  | 0.04 |
| Arthritis                                 |   |      |      |      |       |      |
| No                                        | 0 | REF  | REF  | REF  | REF   | REF  |
| Yes                                       | 1 | 0.99 | 0.95 | 1.02 | -0.01 | 0.02 |
| Other fracture                            |   |      |      |      |       |      |
| No                                        | 0 | REF  | REF  | REF  | REF   | REF  |
| Yes                                       | 1 | 1.69 | 1.58 | 1.80 | 0.52  | 0.03 |
| Aphasia                                   |   |      |      |      |       |      |
| No                                        | 0 | REF  | REF  | REF  | REF   | REF  |
| Yes                                       | 1 | 0.92 | 0.83 | 1.03 | -0.08 | 0.06 |
| Cerebral palsy                            |   |      |      |      |       |      |
| No                                        | 0 | REF  | REF  | REF  | REF   | REF  |
| Yes                                       | 1 | 0.53 | 0.35 | 0.81 | -0.64 | 0.22 |
| Malnutrition                              |   |      |      |      |       |      |
| No                                        | 0 | REF  | REF  | REF  | REF   | REF  |
| Yes                                       | 1 | 1.00 | 0.91 | 1.10 | 0.00  | 0.05 |
| Schizophrenia                             |   |      |      |      |       |      |
| No                                        | 0 | REF  | REF  | REF  | REF   | REF  |
| Yes                                       | 1 | 0.85 | 0.79 | 0.93 | -0.16 | 0.04 |
| Cataracts, glaucoma, macular degeneration |   |      |      |      |       |      |
| No                                        | 0 | REF  | REF  | REF  | REF   | REF  |
| Yes                                       | 1 | 0.97 | 0.92 | 1.01 | -0.04 | 0.02 |

|                                                   |   |      |      |      |       |      |
|---------------------------------------------------|---|------|------|------|-------|------|
| Dyspnea at rest                                   |   |      |      |      |       |      |
| No                                                | 0 | 1.25 | 1.11 | 1.41 | 0.22  | 0.06 |
| Yes                                               | 1 | REF  | REF  | REF  | REF   | REF  |
| <6month life expectancy?                          |   |      |      |      |       |      |
| No                                                | 0 | 1.46 | 1.02 | 2.08 | 0.38  | 0.18 |
| Yes                                               | 1 | REF  | REF  | REF  | REF   | REF  |
| Mechanically altered diet                         |   |      |      |      |       |      |
| No                                                | 0 | 1.04 | 1.00 | 1.09 | 0.04  | 0.02 |
| Yes                                               | 1 | REF  | REF  | REF  | REF   | REF  |
| Skin tear                                         |   |      |      |      |       |      |
| No                                                | 0 | REF  | REF  | REF  | REF   | REF  |
| Yes                                               | 1 | 1.11 | 1.04 | 1.19 | 0.11  | 0.04 |
| Pressure-reducing device for chair                |   |      |      |      |       |      |
| No                                                | 0 | 1.10 | 1.06 | 1.14 | 0.09  | 0.02 |
| Yes                                               | 1 | REF  | REF  | REF  | REF   | REF  |
| Pressure-reducing device for bed                  |   |      |      |      |       |      |
| No                                                | 0 | 0.99 | 0.95 | 1.03 | -0.01 | 0.02 |
| Yes                                               | 1 | REF  | REF  | REF  | REF   | REF  |
| Application of ointments/skin meds                |   |      |      |      |       |      |
| No                                                | 0 | 1.08 | 1.04 | 1.12 | 0.07  | 0.02 |
| Yes                                               | 1 | REF  | REF  | REF  | REF   | REF  |
| Days receiving antianxiety treatment in last 7    |   |      |      |      |       |      |
| Not administered                                  | 0 | REF  | REF  | REF  | REF   | REF  |
| Administered 1-6 days                             | 1 | 1.19 | 1.11 | 1.27 | 0.17  | 0.03 |
| Administered daily                                | 2 | 1.14 | 1.09 | 1.19 | 0.13  | 0.02 |
| Days receiving antidepressant treatment in last 7 |   |      |      |      |       |      |
| Not administered                                  | 0 | REF  | REF  | REF  | REF   | REF  |
| Administered 1-6 days                             | 1 | 1.24 | 1.13 | 1.36 | 0.22  | 0.05 |
| Administered daily                                | 2 | 1.16 | 1.12 | 1.20 | 0.14  | 0.02 |
| Days receiving hypnotic treatment in last 7       |   |      |      |      |       |      |
| Not administered                                  | 0 | REF  | REF  | REF  | REF   | REF  |
| Administered 1-6 days                             | 1 | 1.04 | 0.89 | 1.21 | 0.04  | 0.08 |
| Administered daily                                | 2 | 1.23 | 1.12 | 1.35 | 0.21  | 0.05 |
| Days receiving anticoagulant treatment in last 7  |   |      |      |      |       |      |
| Not administered                                  | 0 | REF  | REF  | REF  | REF   | REF  |
| Administered 1-6 days                             | 1 | 1.15 | 1.03 | 1.28 | 0.14  | 0.06 |
| Administered daily                                | 2 | 1.14 | 1.08 | 1.19 | 0.13  | 0.02 |
| Days receiving antibiotic treatment in last 7     |   |      |      |      |       |      |
| Not administered                                  | 0 | REF  | REF  | REF  | REF   | REF  |
| Administered 1-6 days                             | 1 | 1.00 | 0.94 | 1.07 | 0.00  | 0.03 |
| Administered daily                                | 2 | 1.10 | 1.03 | 1.19 | 0.10  | 0.04 |
| Days receiving diuretic treatment in last 7       |   |      |      |      |       |      |
| Not administered                                  | 0 | REF  | REF  | REF  | REF   | REF  |
| Administered 1-6 days                             | 1 | 1.09 | 1.00 | 1.19 | 0.09  | 0.04 |
| Administered daily                                | 2 | 0.94 | 0.91 | 0.98 | -0.06 | 0.02 |

|                                                 |   |      |      |      |       |      |
|-------------------------------------------------|---|------|------|------|-------|------|
| Received oxygen therapy while admitted          |   |      |      |      |       |      |
| No                                              | 0 | 1.05 | 0.99 | 1.11 | 0.05  | 0.03 |
| Yes                                             | 1 | REF  | REF  | REF  | REF   | REF  |
| Received most recent influenza vaccine          |   |      |      |      |       |      |
| No                                              | 0 | 1.09 | 1.05 | 1.13 | 0.08  | 0.02 |
| Yes                                             | 1 | REF  | REF  | REF  | REF   | REF  |
| Days receiving SLP therapy in last 7            |   |      |      |      |       |      |
| Not administered                                | 0 | REF  | REF  | REF  | REF   | REF  |
| Administered 1-6 days                           | 1 | 1.03 | 0.99 | 1.08 | 0.03  | 0.02 |
| Administered daily                              | 2 | 1.09 | 1.05 | 1.14 | 0.09  | 0.02 |
| Days receiving OT therapy in last 7             |   |      |      |      |       |      |
| Not administered                                | 0 | REF  | REF  | REF  | REF   | REF  |
| Administered 1-6 days                           | 1 | 1.00 | 0.94 | 1.07 | 0.00  | 0.03 |
| Administered daily                              | 2 | 1.03 | 0.97 | 1.09 | 0.02  | 0.03 |
| Days receiving PT therapy in last 7             |   |      |      |      |       |      |
| Not administered                                | 0 | REF  | REF  | REF  | REF   | REF  |
| Administered 1-6 days                           | 1 | 1.05 | 0.99 | 1.12 | 0.05  | 0.03 |
| Administered daily                              | 2 | 1.13 | 1.06 | 1.19 | 0.12  | 0.03 |
| Days receiving passive ROM therapy in last 7    |   |      |      |      |       |      |
| Not administered                                | 0 | 1.31 | 1.10 | 1.56 | 0.27  | 0.09 |
| Administered 1-6 days                           | 1 | 1.13 | 0.92 | 1.39 | 0.12  | 0.11 |
| Administered daily                              | 2 | REF  | REF  | REF  | REF   | REF  |
| Days receiving therapy for eating/swallowing    |   |      |      |      |       |      |
| Not administered                                | 0 | 0.98 | 0.87 | 1.11 | -0.02 | 0.06 |
| Administered at least once                      | 1 | REF  | REF  | REF  | REF   | REF  |
| Decision care planning for falls triggered      |   |      |      |      |       |      |
| No                                              | 0 | REF  | REF  | REF  | REF   | REF  |
| Yes                                             | 1 | 1.00 | 0.93 | 1.07 | 0.00  | 0.04 |
| Hospitalization in 1-year baseline <sup>a</sup> |   |      |      |      |       |      |
| No                                              | 0 | REF  | REF  | REF  | REF   | REF  |
| Yes                                             | 1 | 1.16 | 1.11 | 1.21 | 0.15  | 0.02 |

Abbreviations: CI, Confidence Interval; SHR, Sub-distribution Hazard Ratio

<sup>a</sup>Body Mass Index classifications are derived from World Health Organization classifications

<sup>b</sup>Obtained from Medicare claims

**Supplemental Table S4. Predictors of fall-related injuries included in the final 6-month Fine-Gray sub-distribution hazards regression model (INJURE-NH), development sample.**

| Predictor                           | Code | SHR  | Lower 95% CI | Upper 95% CI | Coefficient | Std Error |
|-------------------------------------|------|------|--------------|--------------|-------------|-----------|
| Age group                           |      |      |              |              |             |           |
| >65 to 75                           | 0    | REF  | REF          | REF          | REF         | REF       |
| >75 to 85                           | 1    | 1.11 | 1.06         | 1.16         | 0.10        | 0.02      |
| >85 to 100                          | 2    | 1.10 | 1.05         | 1.16         | 0.10        | 0.03      |
| ≥100                                | 3    | 1.04 | 0.90         | 1.19         | 0.04        | 0.07      |
| Sex                                 |      |      |              |              |             |           |
| Male                                | 1    | REF  | REF          | REF          | REF         | REF       |
| Female                              | 2    | 1.36 | 1.31         | 1.41         | 0.31        | 0.02      |
| Race                                |      |      |              |              |             |           |
| Native/Other/Unknown                | 0    | 1.65 | 1.41         | 1.94         | 0.50        | 0.08      |
| Non-Hispanic White                  | 1    | 1.59 | 1.49         | 1.71         | 0.46        | 0.04      |
| Black/African American              | 2    | REF  | REF          | REF          | REF         | REF       |
| Asian/Pacific Islander              | 3    | 1.28 | 1.10         | 1.48         | 0.24        | 0.08      |
| Hispanic                            | 4    | 1.64 | 1.49         | 1.81         | 0.50        | 0.05      |
| Visual impairment                   |      |      |              |              |             |           |
| No                                  | 0    | 1.06 | 1.01         | 1.12         | 0.06        | 0.03      |
| Yes                                 | 1    | REF  | REF          | REF          | REF         | REF       |
| Cognitive Function Scale            |      |      |              |              |             |           |
| Intact                              | 1    | 0.97 | 0.88         | 1.06         | -0.03       | 0.05      |
| Mildly Impaired                     | 2    | 0.96 | 0.88         | 1.06         | -0.04       | 0.05      |
| Moderately Impaired                 | 3    | 1.00 | 0.92         | 1.09         | 0.00        | 0.04      |
| Severely Impaired                   | 4    | REF  | REF          | REF          | REF         | REF       |
| ADL Short Form                      |      |      |              |              |             |           |
| 0-8                                 | 0    | 1.08 | 0.95         | 1.23         | 0.08        | 0.07      |
| 9-12                                | 1    | 1.06 | 0.95         | 1.18         | 0.06        | 0.05      |
| 13-16                               | 2    | REF  | REF          | REF          | REF         | REF       |
| Orthostatic Hypotension             |      |      |              |              |             |           |
| No                                  | 0    | REF  | REF          | REF          | REF         | REF       |
| Yes                                 | 1    | 1.15 | 1.03         | 1.28         | 0.14        | 0.06      |
| Diabetes mellitus                   |      |      |              |              |             |           |
| No                                  | 0    | REF  | REF          | REF          | REF         | REF       |
| Yes                                 | 1    | 1.03 | 1.00         | 1.07         | 0.03        | 0.02      |
| Hip fracture                        |      |      |              |              |             |           |
| No                                  | 0    | REF  | REF          | REF          | REF         | REF       |
| Yes                                 | 1    | 1.39 | 1.29         | 1.50         | 0.33        | 0.04      |
| Recent fall                         |      |      |              |              |             |           |
| No fall                             | 0    | REF  | REF          | REF          | REF         | REF       |
| Fell without injury                 | 1    | 1.46 | 1.41         | 1.51         | 0.38        | 0.02      |
| Fall resulting in injury            | 2    | 1.81 | 1.74         | 1.88         | 0.59        | 0.02      |
| Newly admitted in previous 100 days |      |      |              |              |             |           |
| No                                  | 0    | REF  | REF          | REF          | REF         | REF       |
| Yes                                 | 1    | 1.39 | 1.33         | 1.45         | 0.33        | 0.02      |
| Depression (combined)               |      |      |              |              |             |           |
| Minimal                             | 0    | REF  | REF          | REF          | REF         | REF       |
| Mild                                | 1    | 1.06 | 1.01         | 1.11         | 0.06        | 0.02      |

|                                            |   |      |      |      |       |      |
|--------------------------------------------|---|------|------|------|-------|------|
| Moderate to Severe                         | 2 | 1.07 | 1.00 | 1.14 | 0.06  | 0.04 |
| Body Mass Index <sup>a</sup>               |   |      |      |      |       |      |
| Underweight (15 ≤ BMI ≤ 18.5)              | 0 | 1.05 | 0.99 | 1.11 | 0.05  | 0.03 |
| Normal weight (18.5 < BMI ≤ 25)            | 1 | REF  | REF  | REF  | REF   | REF  |
| Overweight (25 < BMI ≤ 30)                 | 2 | 0.83 | 0.79 | 0.86 | -0.19 | 0.02 |
| Obesity Class I (30 < BMI ≤ 35)            | 3 | 0.72 | 0.68 | 0.76 | -0.33 | 0.03 |
| Obesity Class II/III (35 < BMI ≤ 45)       | 4 | 0.63 | 0.59 | 0.68 | -0.46 | 0.04 |
| Implausible (BMI < 15 or > 45)             | 5 | 0.78 | 0.70 | 0.86 | -0.25 | 0.05 |
| Makes self understood                      |   |      |      |      |       |      |
| No                                         | 0 | 1.03 | 0.97 | 1.09 | 0.03  | 0.03 |
| Yes                                        | 1 | REF  | REF  | REF  | REF   | REF  |
| Disorganized thinking                      |   |      |      |      |       |      |
| No                                         | 0 | REF  | REF  | REF  | REF   | REF  |
| Yes                                        | 1 | 1.35 | 1.10 | 1.65 | 0.30  | 0.10 |
| Should mood interview be conducted         |   |      |      |      |       |      |
| No                                         | 0 | REF  | REF  | REF  | REF   | REF  |
| Yes                                        | 1 | 0.98 | 0.91 | 1.05 | -0.02 | 0.04 |
| Behavioral symptoms put individual at risk |   |      |      |      |       |      |
| No                                         | 0 | REF  | REF  | REF  | REF   | REF  |
| Yes                                        | 1 | 1.14 | 1.02 | 1.29 | 0.13  | 0.06 |
| Behavioral symptoms interfere with care    |   |      |      |      |       |      |
| No                                         | 0 | REF  | REF  | REF  | REF   | REF  |
| Yes                                        | 1 | 0.90 | 0.82 | 0.99 | -0.10 | 0.05 |
| Wandering                                  |   |      |      |      |       |      |
| No                                         | 0 | REF  | REF  | REF  | REF   | REF  |
| Yes                                        | 1 | 1.27 | 1.20 | 1.35 | 0.24  | 0.03 |
| Wandering intrudes on privacy              |   |      |      |      |       |      |
| No                                         | 0 | REF  | REF  | REF  | REF   | REF  |
| Yes                                        | 1 | 1.06 | 0.95 | 1.17 | 0.06  | 0.05 |
| Change in behavior                         |   |      |      |      |       |      |
| Same                                       | 0 | REF  | REF  | REF  | REF   | REF  |
| Improved                                   | 1 | 1.09 | 0.99 | 1.21 | 0.09  | 0.05 |
| Worse                                      | 2 | 1.16 | 1.06 | 1.27 | 0.15  | 0.04 |
| N/A                                        | 3 | 1.04 | 1.00 | 1.08 | 0.03  | 0.02 |
| Transfer - support                         |   |      |      |      |       |      |
| No setup or help                           | 0 | 1.15 | 1.05 | 1.27 | 0.14  | 0.05 |
| Setup help only                            | 1 | 1.11 | 1.02 | 1.20 | 0.10  | 0.04 |
| One person assist                          | 2 | 1.18 | 1.12 | 1.23 | 0.16  | 0.02 |
| Two+ people assist                         | 3 | REF  | REF  | REF  | REF   | REF  |
| Walk in room - self-performance            |   |      |      |      |       |      |
| Independent                                | 0 | 1.38 | 1.25 | 1.53 | 0.32  | 0.05 |
| Supervision                                | 1 | 1.33 | 1.23 | 1.43 | 0.28  | 0.04 |
| Limited assistance                         | 2 | 1.24 | 1.17 | 1.32 | 0.22  | 0.03 |
| Extensive assistance                       | 3 | 1.23 | 1.16 | 1.30 | 0.20  | 0.03 |
| Total dependence                           | 4 | REF  | REF  | REF  | REF   | REF  |
| Walk in corridor - support                 |   |      |      |      |       |      |
| No setup or help                           | 0 | 1.09 | 0.99 | 1.21 | 0.09  | 0.05 |
| Setup help only                            | 1 | 1.13 | 1.03 | 1.22 | 0.12  | 0.04 |

|                                        |   |      |      |      |       |      |
|----------------------------------------|---|------|------|------|-------|------|
| One person assist                      | 2 | 1.09 | 1.04 | 1.15 | 0.09  | 0.03 |
| Two+ people assist                     | 3 | REF  | REF  | REF  | REF   | REF  |
| Locomotion on unit - self-performance  |   |      |      |      |       |      |
| Independent                            | 0 | 1.10 | 0.96 | 1.27 | 0.10  | 0.07 |
| Supervision                            | 1 | 1.16 | 1.04 | 1.30 | 0.15  | 0.06 |
| Limited assistance                     | 2 | 1.25 | 1.14 | 1.38 | 0.22  | 0.05 |
| Extensive assistance                   | 3 | 1.11 | 1.02 | 1.21 | 0.11  | 0.04 |
| Total dependence                       | 4 | REF  | REF  | REF  | REF   | REF  |
| Locomotion on unit - support           |   |      |      |      |       |      |
| No setup or help                       | 0 | 1.23 | 1.06 | 1.43 | 0.21  | 0.08 |
| Setup help only                        | 1 | 1.24 | 1.09 | 1.41 | 0.22  | 0.07 |
| One person assist                      | 2 | 1.14 | 1.03 | 1.26 | 0.13  | 0.05 |
| Two+ people assist                     | 3 | REF  | REF  | REF  | REF   | REF  |
| Locomotion off unit - self-performance |   |      |      |      |       |      |
| Independent                            | 0 | 1.06 | 0.95 | 1.18 | 0.06  | 0.06 |
| Supervision                            | 1 | 1.05 | 0.98 | 1.14 | 0.05  | 0.04 |
| Limited assistance                     | 2 | 1.04 | 0.97 | 1.11 | 0.04  | 0.04 |
| Extensive assistance                   | 3 | 1.04 | 0.98 | 1.10 | 0.04  | 0.03 |
| Total dependence                       | 4 | REF  | REF  | REF  | REF   | REF  |
| Locomotion off unit - support          |   |      |      |      |       |      |
| No setup or help                       | 0 | 0.94 | 0.84 | 1.06 | -0.06 | 0.06 |
| Setup help only                        | 1 | 0.90 | 0.81 | 0.99 | -0.11 | 0.05 |
| One person assist                      | 2 | 0.97 | 0.90 | 1.04 | -0.03 | 0.04 |
| Two+ people assist                     | 3 | REF  | REF  | REF  | REF   | REF  |
| Dressing - self-performance            |   |      |      |      |       |      |
| Independent                            | 0 | 0.97 | 0.86 | 1.10 | -0.03 | 0.06 |
| Supervision                            | 1 | 0.96 | 0.86 | 1.08 | -0.04 | 0.06 |
| Limited assistance                     | 2 | 1.04 | 0.94 | 1.16 | 0.04  | 0.05 |
| Extensive assistance                   | 3 | 1.02 | 0.93 | 1.12 | 0.02  | 0.05 |
| Total dependence                       | 4 | REF  | REF  | REF  | REF   | REF  |
| Eating - self-performance              |   |      |      |      |       |      |
| Independent                            | 0 | 1.21 | 1.05 | 1.39 | 0.19  | 0.07 |
| Supervision                            | 1 | 1.21 | 1.05 | 1.39 | 0.19  | 0.07 |
| Limited assistance                     | 2 | 1.20 | 1.05 | 1.38 | 0.18  | 0.07 |
| Extensive assistance                   | 3 | 1.08 | 0.95 | 1.23 | 0.08  | 0.07 |
| Total dependence                       | 4 | REF  | REF  | REF  | REF   | REF  |
| Limited ROM - upper extremity          |   |      |      |      |       |      |
| No impairment                          | 0 | REF  | REF  | REF  | REF   | REF  |
| Impairment on one side                 | 1 | 1.00 | 0.94 | 1.06 | 0.00  | 0.03 |
| Impairment on two sides                | 2 | 0.93 | 0.86 | 1.01 | -0.07 | 0.04 |
| Limited ROM - lower extremity          |   |      |      |      |       |      |
| No impairment                          | 0 | REF  | REF  | REF  | REF   | REF  |
| Impairment on one side                 | 1 | 1.07 | 1.02 | 1.13 | 0.07  | 0.03 |
| Impairment on two sides                | 2 | 0.96 | 0.91 | 1.02 | -0.04 | 0.03 |
| Cane/crutch                            |   |      |      |      |       |      |
| No                                     | 0 | REF  | REF  | REF  | REF   | REF  |
| Yes                                    | 1 | 1.08 | 0.97 | 1.19 | 0.07  | 0.05 |
| Walker                                 |   |      |      |      |       |      |
| No                                     | 0 | REF  | REF  | REF  | REF   | REF  |

|                                           |   |      |      |      |       |      |
|-------------------------------------------|---|------|------|------|-------|------|
| Yes                                       | 1 | 1.02 | 0.98 | 1.06 | 0.02  | 0.02 |
| Wheelchair                                |   |      |      |      |       |      |
| No                                        | 0 | REF  | REF  | REF  | REF   | REF  |
| Yes                                       | 1 | 0.92 | 0.88 | 0.97 | -0.08 | 0.02 |
| Ostomy                                    |   |      |      |      |       |      |
| No                                        | 0 | REF  | REF  | REF  | REF   | REF  |
| Yes                                       | 1 | 0.95 | 0.75 | 1.20 | -0.05 | 0.12 |
| Urinary continence                        |   |      |      |      |       |      |
| Always continent                          | 0 | 1.40 | 1.30 | 1.52 | 0.34  | 0.04 |
| Occasionally incontinent                  | 1 | 1.37 | 1.27 | 1.47 | 0.31  | 0.04 |
| Frequently incontinent                    | 2 | 1.16 | 1.09 | 1.24 | 0.15  | 0.03 |
| Always incontinent                        | 3 | REF  | REF  | REF  | REF   | REF  |
| Not rated                                 | 9 | 1.00 | 0.91 | 1.11 | 0.00  | 0.05 |
| Bowel continence                          |   |      |      |      |       |      |
| Always continent                          | 0 | 0.98 | 0.91 | 1.06 | -0.02 | 0.04 |
| Occasionally incontinent                  | 1 | 1.01 | 0.93 | 1.09 | 0.01  | 0.04 |
| Frequently incontinent                    | 2 | 0.98 | 0.92 | 1.05 | -0.02 | 0.04 |
| Always incontinent                        | 3 | REF  | REF  | REF  | REF   | REF  |
| Not rated                                 | 9 | 0.85 | 0.66 | 1.09 | -0.16 | 0.13 |
| Cancer                                    |   |      |      |      |       |      |
| No                                        | 0 | REF  | REF  | REF  | REF   | REF  |
| Yes                                       | 1 | 0.95 | 0.89 | 1.01 | -0.05 | 0.03 |
| GERD/Ulcer                                |   |      |      |      |       |      |
| No                                        | 0 | REF  | REF  | REF  | REF   | REF  |
| Yes                                       | 1 | 1.04 | 1.01 | 1.08 | 0.04  | 0.02 |
| UTI in last 30 days                       |   |      |      |      |       |      |
| No                                        | 0 | REF  | REF  | REF  | REF   | REF  |
| Yes                                       | 1 | 1.05 | 0.98 | 1.12 | 0.04  | 0.03 |
| Arthritis                                 |   |      |      |      |       |      |
| No                                        | 0 | REF  | REF  | REF  | REF   | REF  |
| Yes                                       | 1 | 0.97 | 0.94 | 1.01 | -0.03 | 0.02 |
| Other fracture                            |   |      |      |      |       |      |
| No                                        | 0 | REF  | REF  | REF  | REF   | REF  |
| Yes                                       | 1 | 1.77 | 1.67 | 1.87 | 0.57  | 0.03 |
| Aphasia                                   |   |      |      |      |       |      |
| No                                        | 0 | REF  | REF  | REF  | REF   | REF  |
| Yes                                       | 1 | 0.90 | 0.81 | 1.00 | -0.11 | 0.05 |
| Cerebral palsy                            |   |      |      |      |       |      |
| No                                        | 0 | REF  | REF  | REF  | REF   | REF  |
| Yes                                       | 1 | 0.57 | 0.39 | 0.83 | -0.57 | 0.20 |
| Malnutrition                              |   |      |      |      |       |      |
| No                                        | 0 | REF  | REF  | REF  | REF   | REF  |
| Yes                                       | 1 | 1.06 | 0.97 | 1.15 | 0.06  | 0.04 |
| Schizophrenia                             |   |      |      |      |       |      |
| No                                        | 0 | REF  | REF  | REF  | REF   | REF  |
| Yes                                       | 1 | 0.91 | 0.84 | 0.98 | -0.10 | 0.04 |
| Cataracts, glaucoma, macular degeneration |   |      |      |      |       |      |
| No                                        | 0 | REF  | REF  | REF  | REF   | REF  |



|                                                   |   |      |      |      |       |      |
|---------------------------------------------------|---|------|------|------|-------|------|
| Yes                                               | 1 | 0.97 | 0.92 | 1.01 | -0.04 | 0.02 |
| Dyspnea at rest                                   |   |      |      |      |       |      |
| No                                                | 0 | 1.19 | 1.07 | 1.33 | 0.18  | 0.05 |
| Yes                                               | 1 | REF  | REF  | REF  | REF   | REF  |
| <6month life expectancy?                          |   |      |      |      |       |      |
| No                                                | 0 | 1.36 | 0.99 | 1.87 | 0.31  | 0.16 |
| Yes                                               | 1 | REF  | REF  | REF  | REF   | REF  |
| Mechanically altered diet                         |   |      |      |      |       |      |
| No                                                | 0 | 1.04 | 1.00 | 1.08 | 0.04  | 0.02 |
| Yes                                               | 1 | REF  | REF  | REF  | REF   | REF  |
| Skin tear                                         |   |      |      |      |       |      |
| No                                                | 0 | REF  | REF  | REF  | REF   | REF  |
| Yes                                               | 1 | 1.15 | 1.09 | 1.23 | 0.14  | 0.03 |
| Pressure-reducing device for chair                |   |      |      |      |       |      |
| No                                                | 0 | 1.07 | 1.03 | 1.11 | 0.06  | 0.02 |
| Yes                                               | 1 | REF  | REF  | REF  | REF   | REF  |
| Pressure-reducing device for bed                  |   |      |      |      |       |      |
| No                                                | 0 | 1.05 | 1.01 | 1.10 | 0.05  | 0.02 |
| Yes                                               | 1 | REF  | REF  | REF  | REF   | REF  |
| Application of ointments/skin meds                |   |      |      |      |       |      |
| No                                                | 0 | 1.07 | 1.03 | 1.10 | 0.07  | 0.02 |
| Yes                                               | 1 | REF  | REF  | REF  | REF   | REF  |
| Days receiving antianxiety treatment in last 7    |   |      |      |      |       |      |
| Not administered                                  | 0 | REF  | REF  | REF  | REF   | REF  |
| Administered 1-6 days                             | 1 | 1.23 | 1.15 | 1.30 | 0.20  | 0.03 |
| Administered daily                                | 2 | 1.09 | 1.05 | 1.14 | 0.09  | 0.02 |
| Days receiving antidepressant treatment in last 7 |   |      |      |      |       |      |
| Not administered                                  | 0 | REF  | REF  | REF  | REF   | REF  |
| Administered 1-6 days                             | 1 | 1.26 | 1.16 | 1.37 | 0.23  | 0.04 |
| Administered daily                                | 2 | 1.19 | 1.15 | 1.23 | 0.17  | 0.02 |
| Days receiving hypnotic treatment in last 7       |   |      |      |      |       |      |
| Not administered                                  | 0 | REF  | REF  | REF  | REF   | REF  |
| Administered 1-6 days                             | 1 | 1.09 | 0.95 | 1.25 | 0.08  | 0.07 |
| Administered daily                                | 2 | 1.15 | 1.06 | 1.26 | 0.14  | 0.04 |
| Days receiving anticoagulant treatment in last 7  |   |      |      |      |       |      |
| Not administered                                  | 0 | REF  | REF  | REF  | REF   | REF  |
| Administered 1-6 days                             | 1 | 1.16 | 1.05 | 1.28 | 0.14  | 0.05 |
| Administered daily                                | 2 | 1.10 | 1.05 | 1.15 | 0.09  | 0.02 |
| Days receiving antibiotic treatment in last 7     |   |      |      |      |       |      |
| Not administered                                  | 0 | REF  | REF  | REF  | REF   | REF  |
| Administered 1-6 days                             | 1 | 1.05 | 0.99 | 1.11 | 0.05  | 0.03 |
| Administered daily                                | 2 | 1.13 | 1.06 | 1.21 | 0.12  | 0.03 |
| Days receiving diuretic treatment in last 7       |   |      |      |      |       |      |
| Not administered                                  | 0 | REF  | REF  | REF  | REF   | REF  |
| Administered 1-6 days                             | 1 | 0.98 | 0.90 | 1.06 | -0.02 | 0.04 |

|                                                 |   |      |      |      |       |      |
|-------------------------------------------------|---|------|------|------|-------|------|
| Administered daily                              | 2 | 0.97 | 0.93 | 1.00 | -0.03 | 0.02 |
| Received oxygen therapy while admitted          |   |      |      |      |       |      |
| No                                              | 0 | 1.01 | 0.96 | 1.06 | 0.01  | 0.03 |
| Yes                                             | 1 | REF  | REF  | REF  | REF   | REF  |
| Received most recent influenza vaccine          |   |      |      |      |       |      |
| No                                              | 0 | 1.11 | 1.07 | 1.15 | 0.11  | 0.02 |
| Yes                                             | 1 | REF  | REF  | REF  | REF   | REF  |
| Days receiving SLP therapy in last 7            |   |      |      |      |       |      |
| Not administered                                | 0 | REF  | REF  | REF  | REF   | REF  |
| Administered 1-6 days                           | 1 | 1.03 | 0.98 | 1.07 | 0.03  | 0.02 |
| Administered daily                              | 2 | 1.10 | 1.05 | 1.14 | 0.09  | 0.02 |
| Days receiving OT therapy in last 7             |   |      |      |      |       |      |
| Not administered                                | 0 | REF  | REF  | REF  | REF   | REF  |
| Administered 1-6 days                           | 1 | 1.06 | 1.00 | 1.13 | 0.06  | 0.03 |
| Administered daily                              | 2 | 1.07 | 1.01 | 1.13 | 0.07  | 0.03 |
| Days receiving PT therapy in last 7             |   |      |      |      |       |      |
| Not administered                                | 0 | REF  | REF  | REF  | REF   | REF  |
| Administered 1-6 days                           | 1 | 1.05 | 0.99 | 1.11 | 0.04  | 0.03 |
| Administered daily                              | 2 | 1.09 | 1.03 | 1.15 | 0.09  | 0.03 |
| Days receiving passive ROM therapy in last 7    |   |      |      |      |       |      |
| Not administered                                | 0 | 1.20 | 1.03 | 1.41 | 0.18  | 0.08 |
| Administered 1-6 days                           | 1 | 0.97 | 0.80 | 1.17 | -0.03 | 0.10 |
| Administered daily                              | 2 | REF  | REF  | REF  | REF   | REF  |
| Days receiving therapy for eating/swallowing    |   |      |      |      |       |      |
| Not administered                                | 0 | 1.10 | 0.98 | 1.24 | 0.10  | 0.06 |
| Administered at least once                      | 1 | REF  | REF  | REF  | REF   | REF  |
| Decision care planning for falls triggered      |   |      |      |      |       |      |
| No                                              | 0 | REF  | REF  | REF  | REF   | REF  |
| Yes                                             | 1 | 1.01 | 0.95 | 1.08 | 0.01  | 0.03 |
| Hospitalization in 1 year baseline <sup>b</sup> |   |      |      |      |       |      |
| No                                              | 0 | REF  | REF  | REF  | REF   | REF  |
| Yes                                             | 1 | 1.16 | 1.11 | 1.21 | 0.15  | 0.02 |

Abbreviations: CI, Confidence Interval; SHR, Sub-distribution Hazard Ratio

<sup>a</sup>Body Mass Index classifications are derived from World Health Organization classifications.

<sup>b</sup>Obtained from Medicare claims
